# Supplementary material for: A New Hypoglycemic Prenylated Indole Alkaloid N-Oxide from Endophytic Fungus Pallidocercospora crystalline
Source: MDPI journal article supplement (doi:10.3390/ijms24108767), 2023-05-15
Supplement: s1 [file s1]

## Supplementary Material

### A New Hypoglycemic Prenylated Indole Alkaloid *N*-Oxide from Endophytic Fungus *Pallidocercospora crystalline*

Shuo Gao <sup>1,†</sup>, Xiao Lin <sup>2,†</sup>, Yeqin Shi <sup>1</sup>, Hu Zhou <sup>1</sup>, Xiao Zheng <sup>1</sup>, Mingyu Li <sup>1,\*</sup> and Ting Lin <sup>1,\*</sup>

<sup>1</sup> School of Pharmaceutical Sciences, Fujian Provincial Key Laboratory of Innovative Drug Target Research, Xiamen University, Xiamen, 361102, China

<sup>2</sup> Department of Basic Medical Sciences, School of Medicine, Xiamen University, Xiamen 361102, China

\* Correspondence: limingyu@xmu.edu.cn (M. Li), linting@xmu.edu.cn (T. Lin).

† These authors contributed equally to this work.

#### Contents

|                                                                                                |    |
|------------------------------------------------------------------------------------------------|----|
| Data S1. Positive HR-ESI-MS data of <i>N</i> -oxides and their reduction reaction product..... | 2  |
| Data S2. NMR, HR-ESI-MS, UV and IR Spectra.....                                                | 10 |
| Data S3. Analysis of (+)-HR-ESI-MS/MS data of compound 1 and 5.....                            | 30 |
| Data S4. Biological assay.....                                                                 | 33 |
| Data S5. The BLAST search result of ITS sequence of fungus A-S-6. ....                         | 35 |

**Data S1. Positive HR-ESI-MS data of *N*-oxides and their reduction reaction products.**

1B #37 RT: 0.35 AV: 1 NL: 3.35E9  
T: FTMS + p ESI Full ms [100.0000-1000.0000]

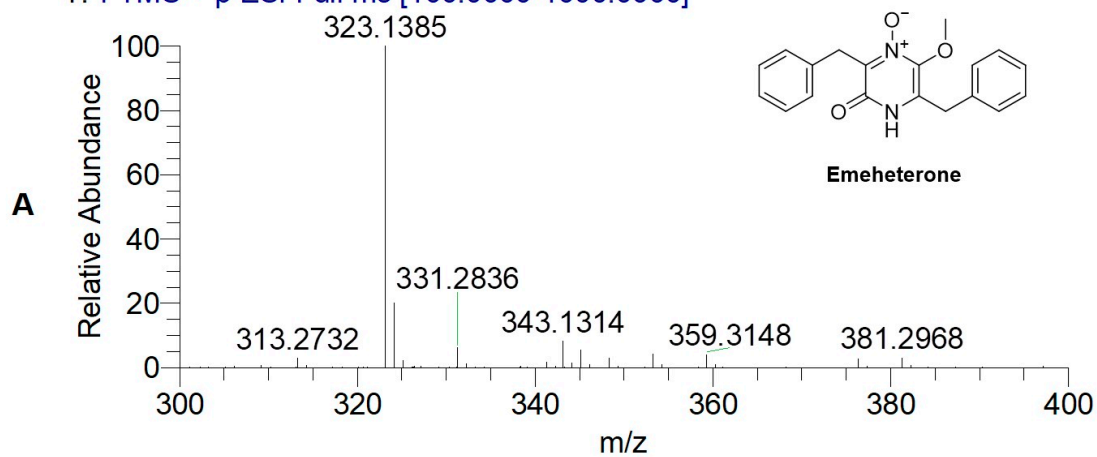

1C #39 RT: 0.37 AV: 1 NL: 2.91E9  
T: FTMS + p ESI Full ms [100.0000-1000.0000]

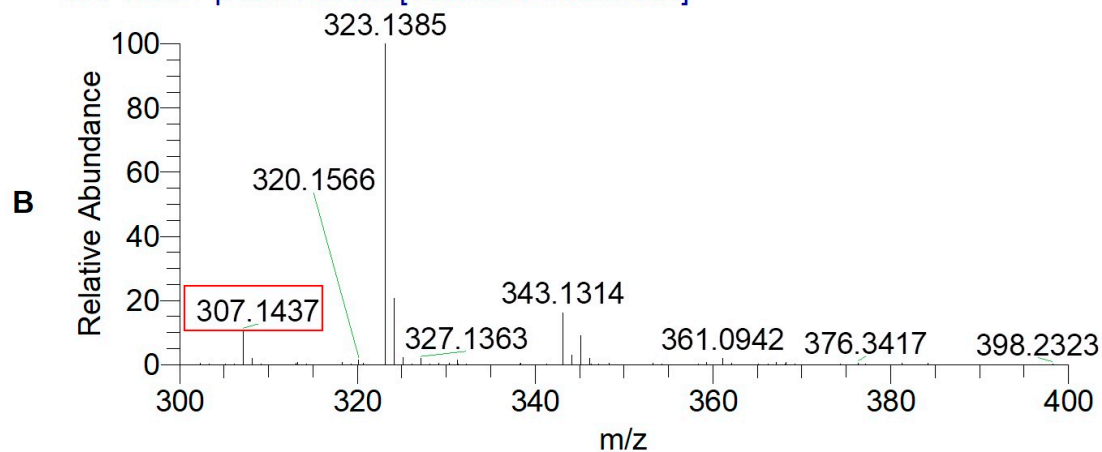

**Figure S1.** A: Positive MS of emeheterone; B: Positive MS of reduction reaction product of emeheterone (red box) by In.

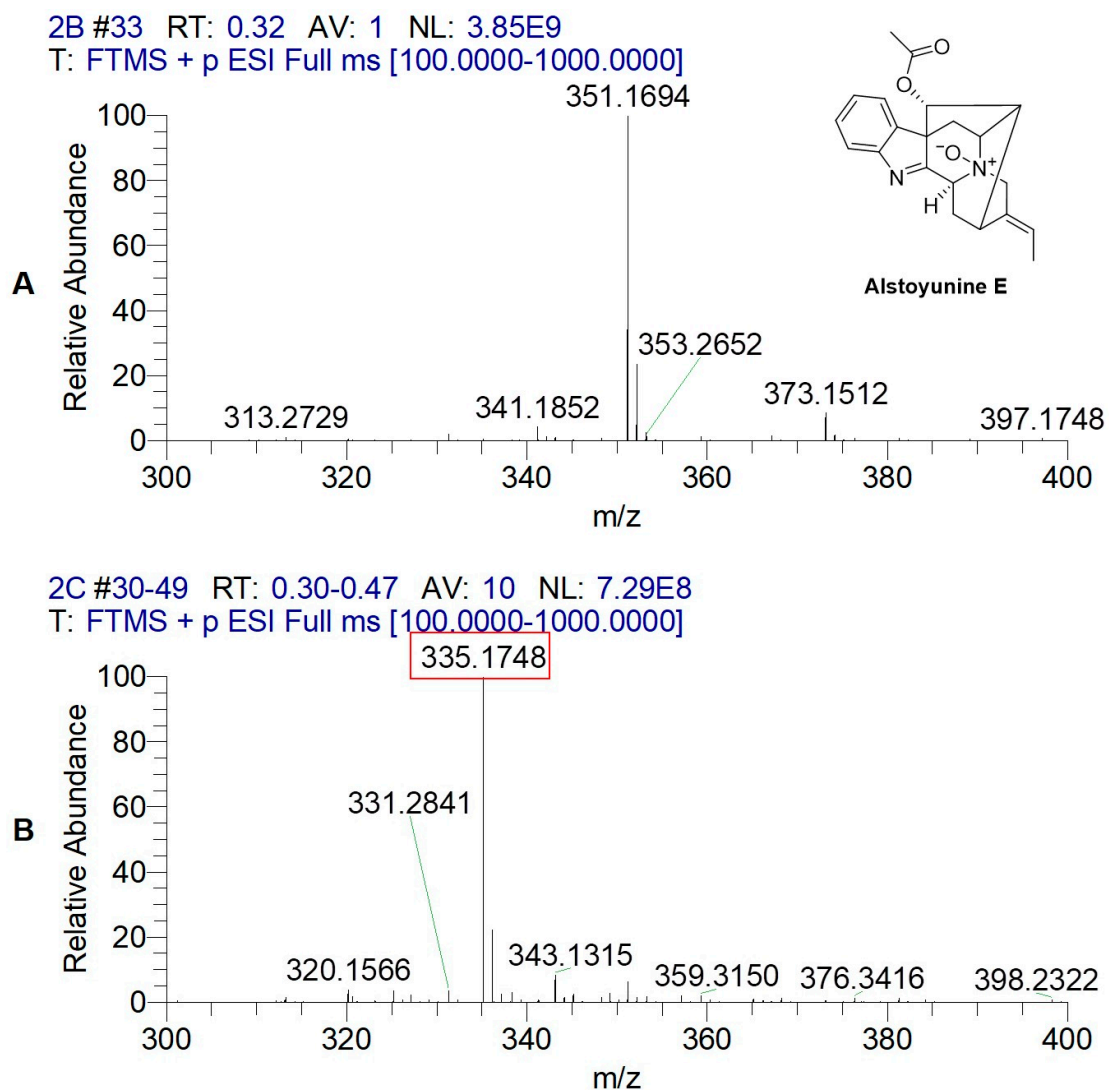

**Figure S2.** **A:** Positive MS of alstoyunine E; **B:** Positive MS of reduction reaction product of alstoyunine E (red box) by In.

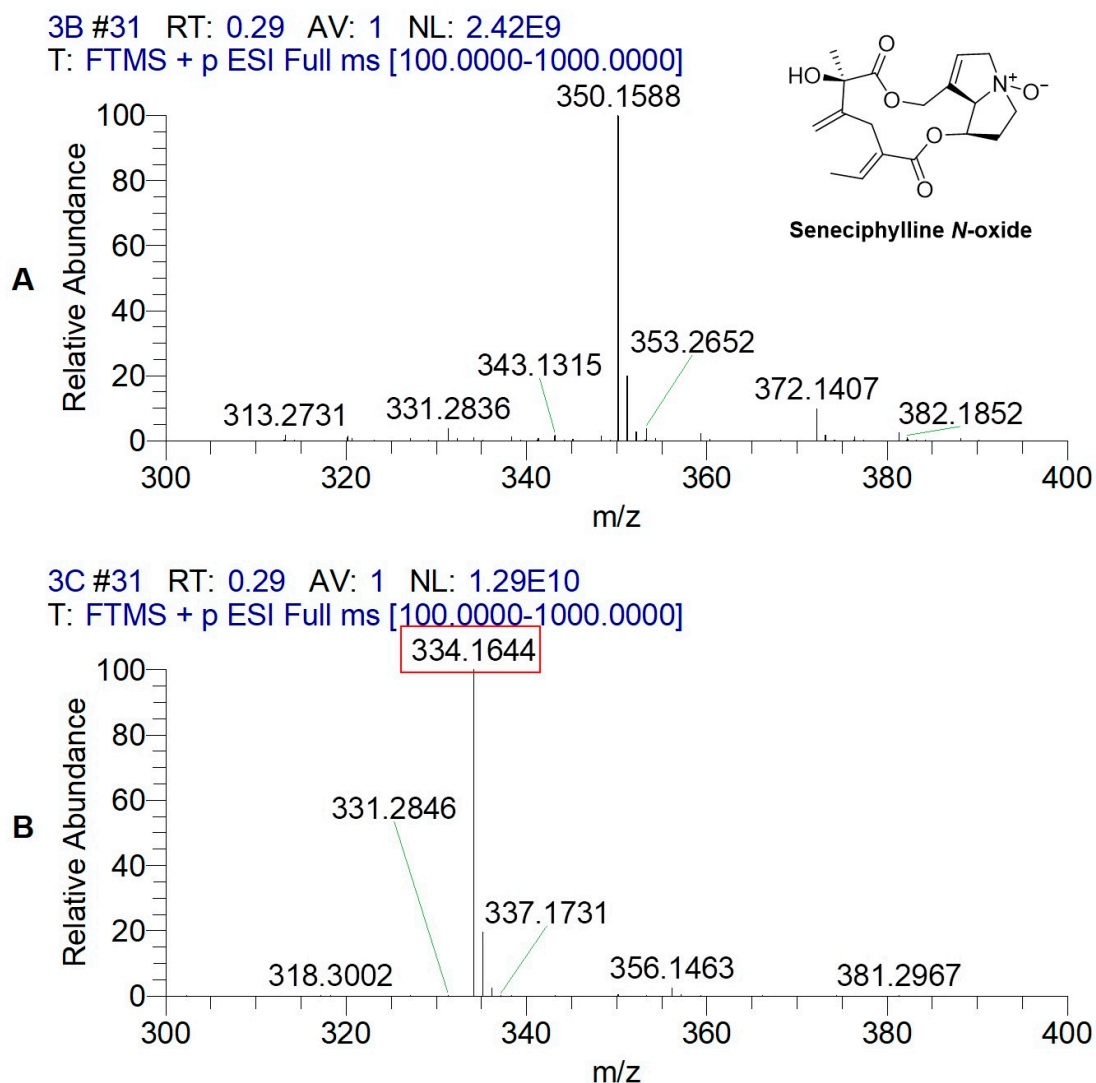

**Figure S3. A:** Positive MS of seneciophylline *N*-oxide; **B:** Positive MS of reduction reaction product of seneciophylline *N*-oxide (red box) by In.

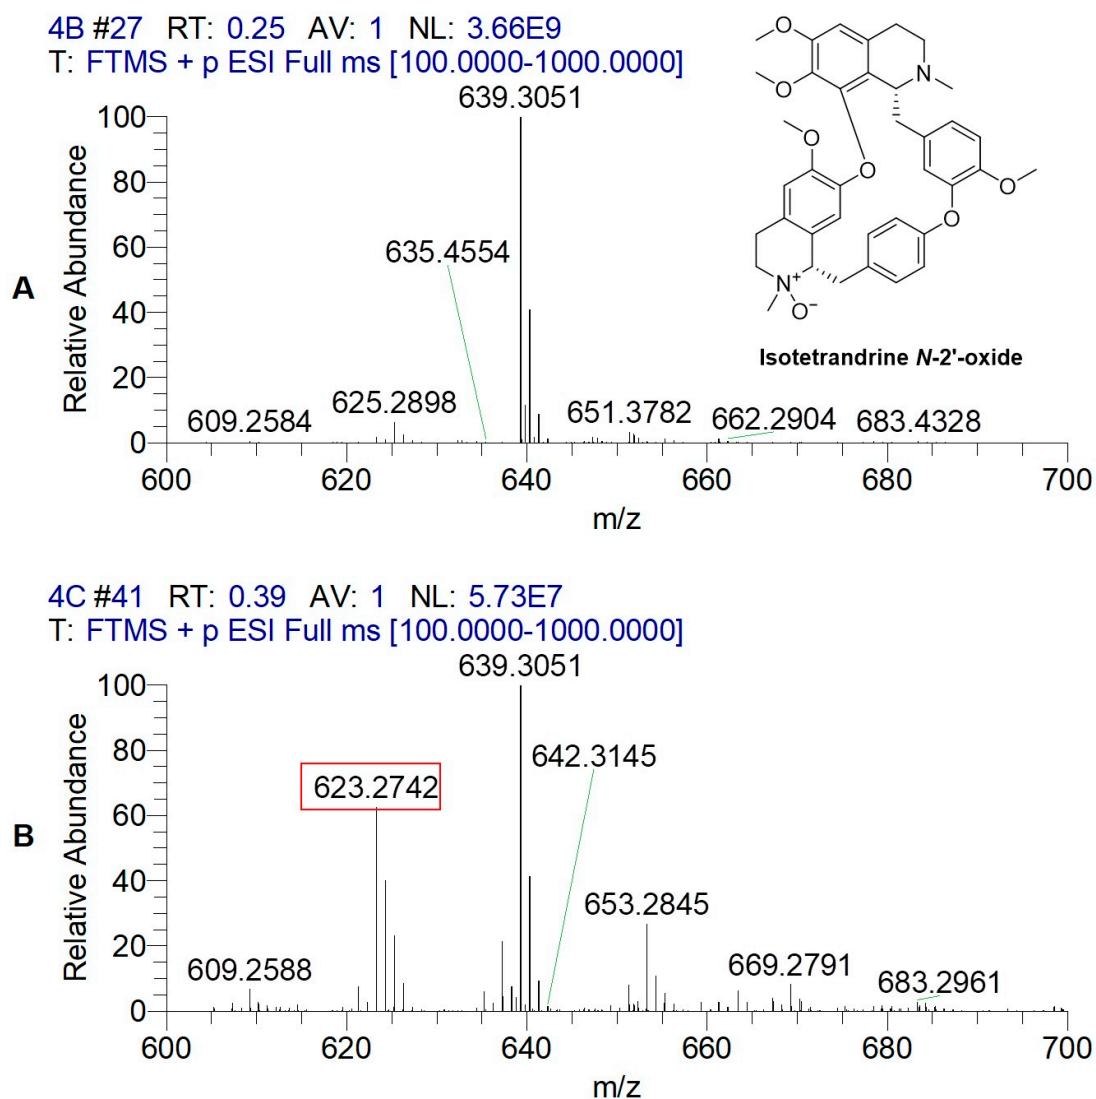

**Figure S4.** **A:** Positive MS of isotetrandrine *N*-2'-oxide; **B:** Positive MS of reduction reaction product of isotetrandrine *N*-2'-oxide (red box) by In.

5B #29 RT: 0.27 AV: 1 NL: 3.32E9  
T: FTMS + p ESI Full ms [100.0000-1000.0000]

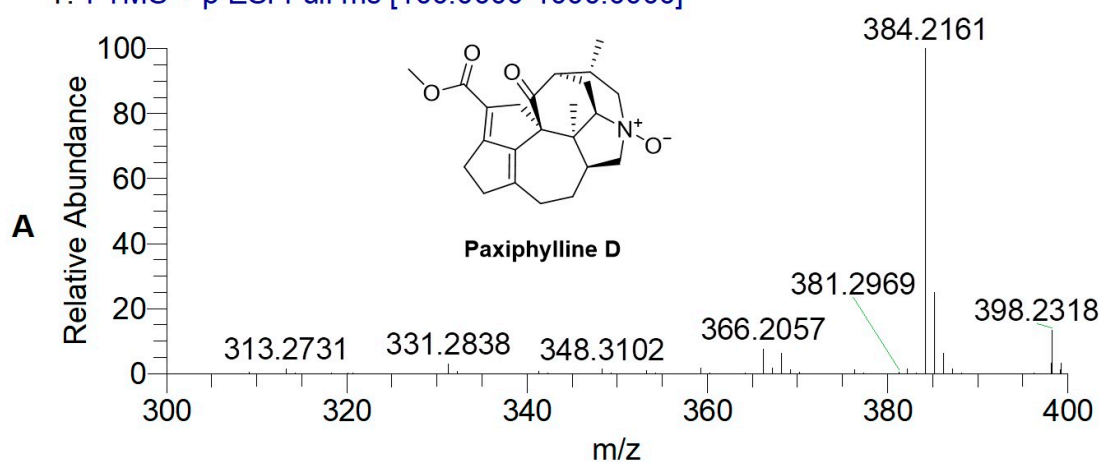

5C #47 RT: 0.45 AV: 1 NL: 8.68E9  
T: FTMS + p ESI Full ms [100.0000-1000.0000]

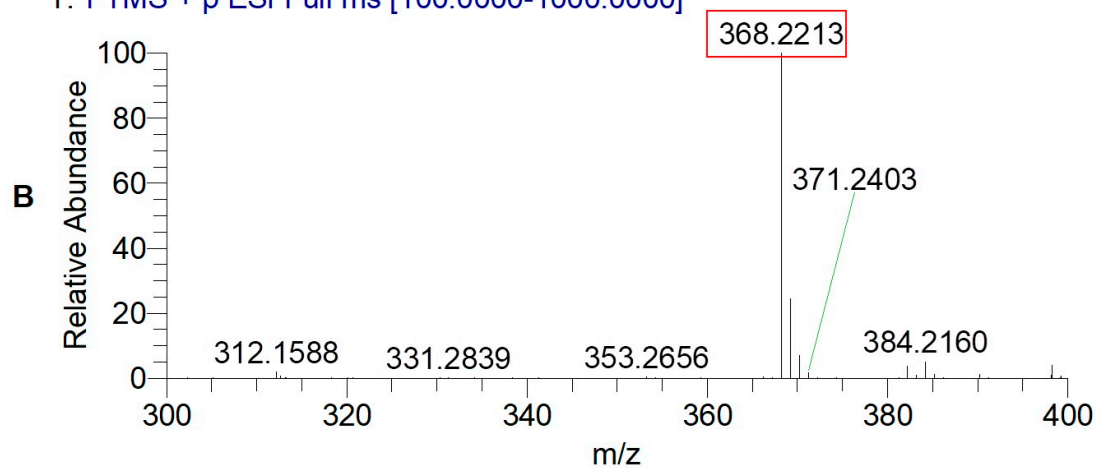

**Figure S5. A:** Positive MS of paxiphylline D; **B:** Positive MS of reduction reaction product of paxiphylline D (red box) by In.

6B #39 RT: 0.37 AV: 1 NL: 1.68E9  
T: FTMS + p ESI Full ms [100.0000-1000.0000]

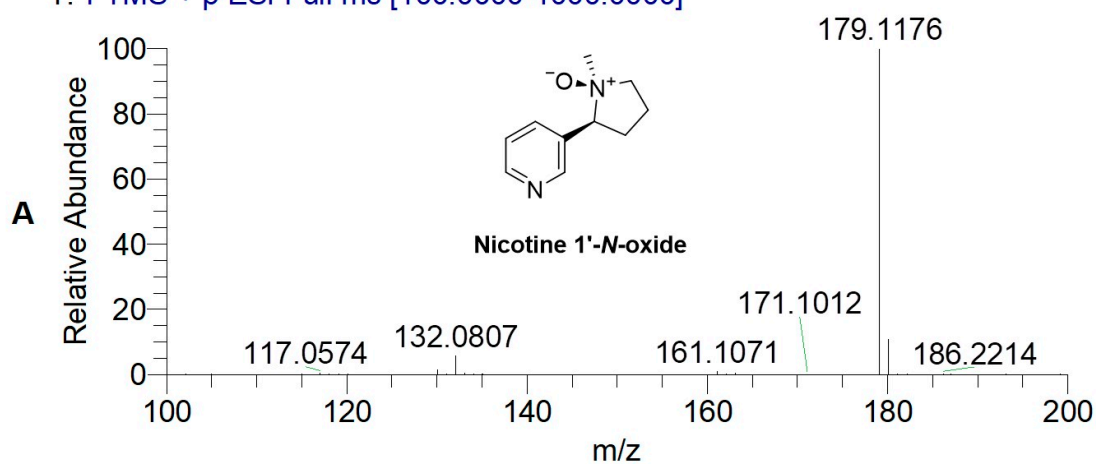

6C #43 RT: 0.41 AV: 1 NL: 2.62E9  
T: FTMS + p ESI Full ms [100.0000-1000.0000]

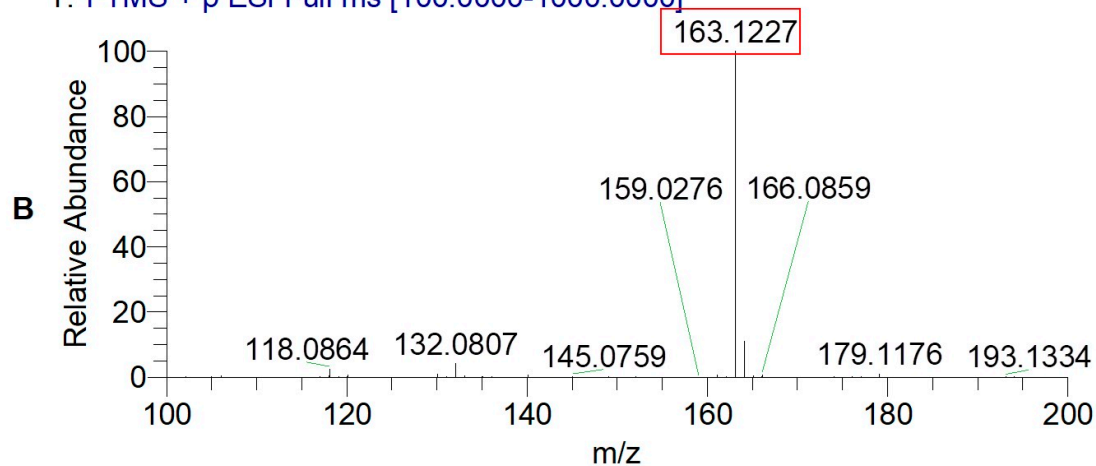

**Figure S6.** A: Positive MS of nicotine 1'-N-oxide; B: Positive MS of reduction reaction product of nicotine 1'-N-oxide (red box) by In.

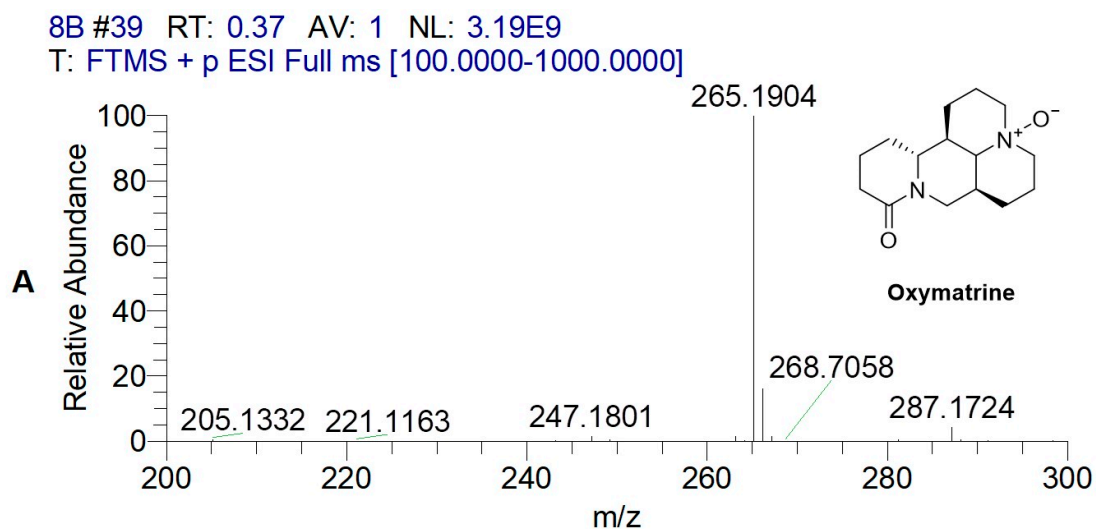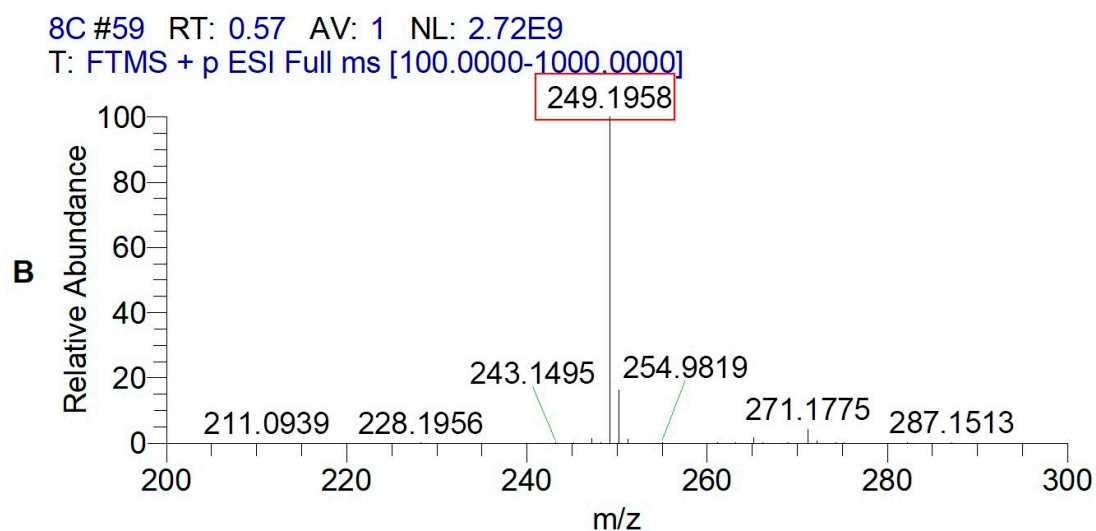

**Figure S7. A:** Positive MS of oxymatrine; **B:** Positive MS of reduction reaction product of oxymatrine (red box) by In.



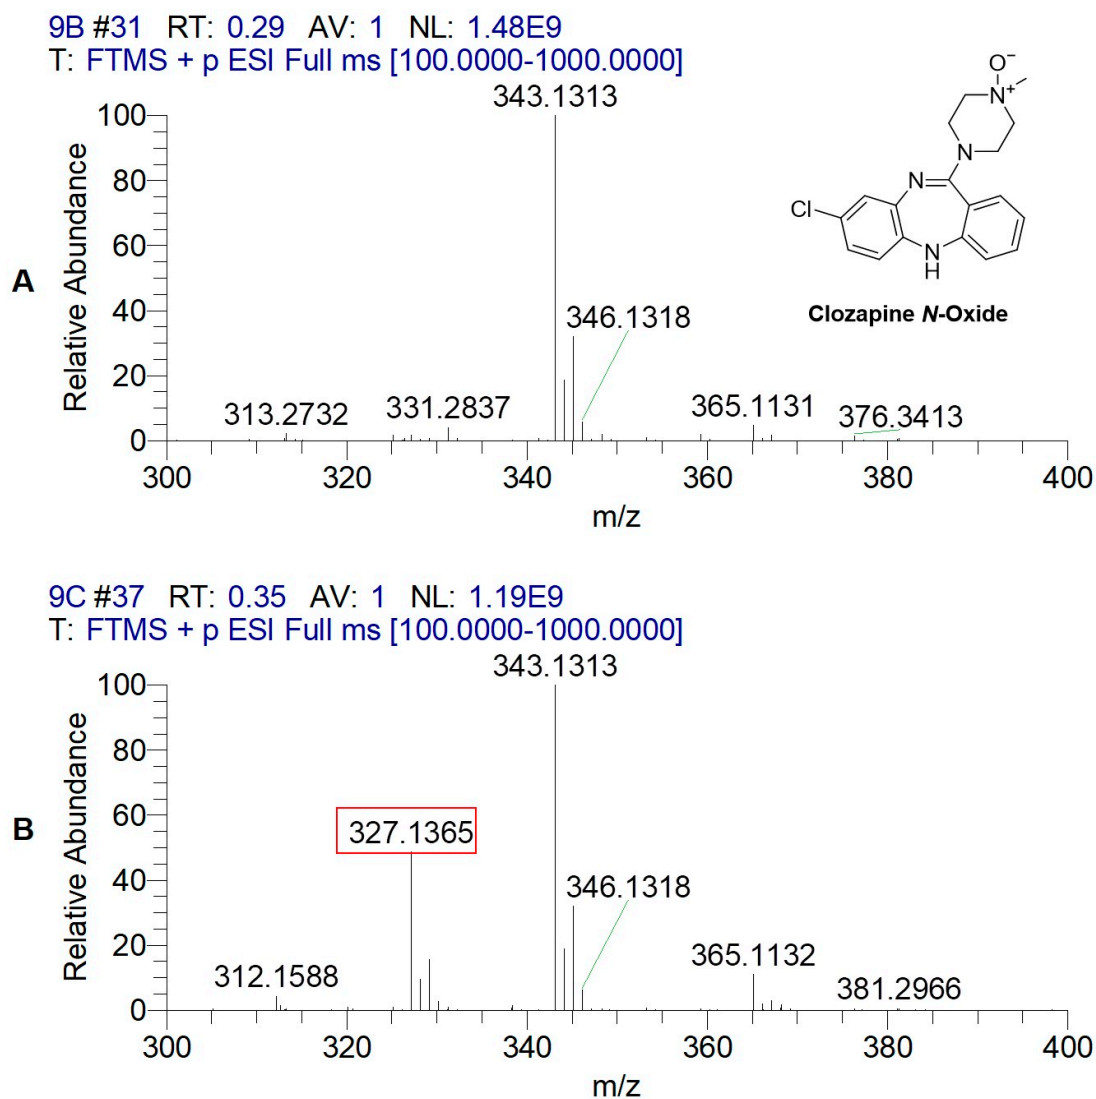

**Figure S8.** A: Positive MS of clozapine *N*-oxide; B: Positive MS of reduction reaction product of clozapine *N*-oxide (red box) by In.

**Data S2. NMR, HR-ESI-MS, UV and IR Spectra.**

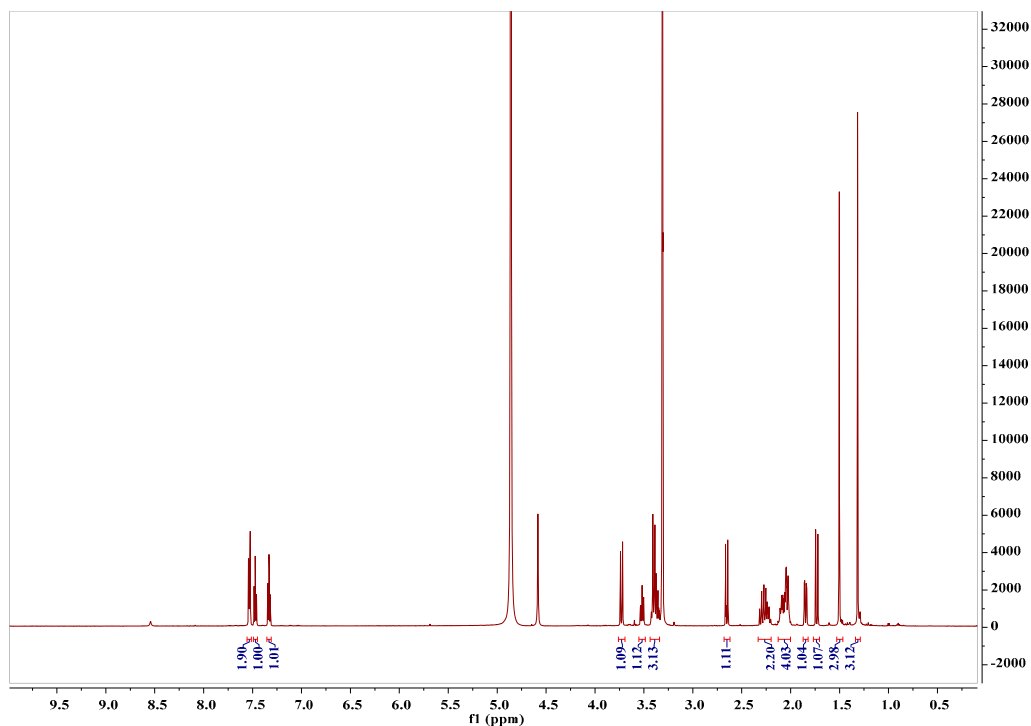

**Figure S9.** <sup>1</sup>H-NMR spectrum of compound **1** (600 MHz in methanol-*d*<sub>4</sub>).

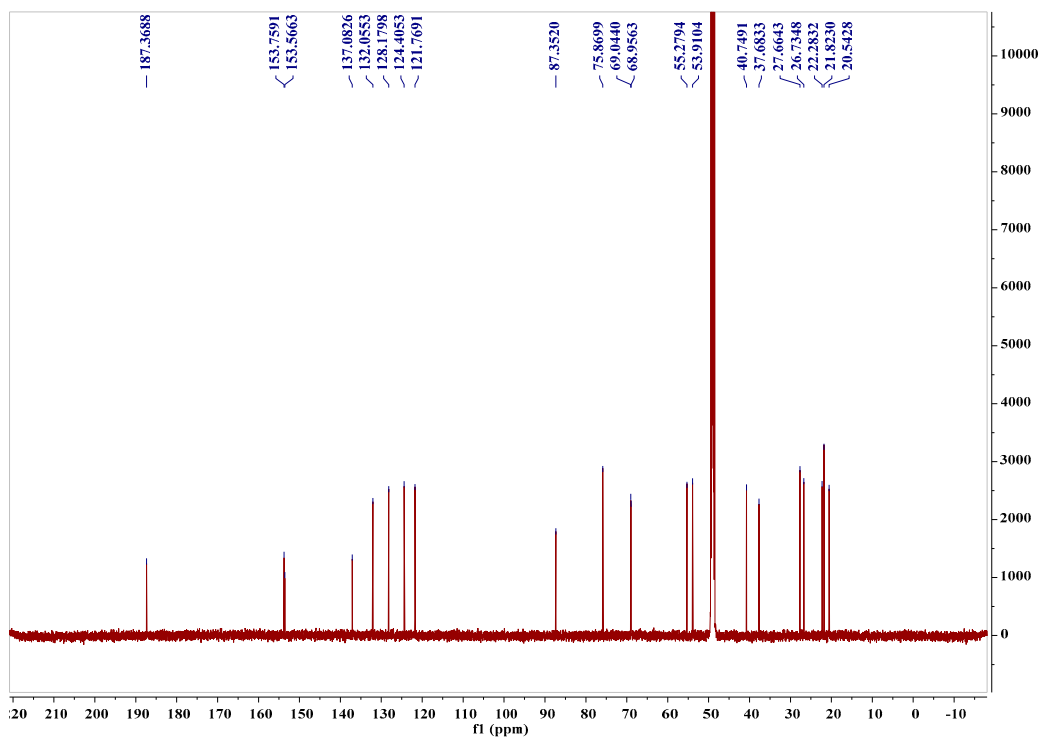

**Figure S10.** <sup>13</sup>C-NMR spectrum of compound **1** (150 MHz in methanol-*d*<sub>4</sub>).

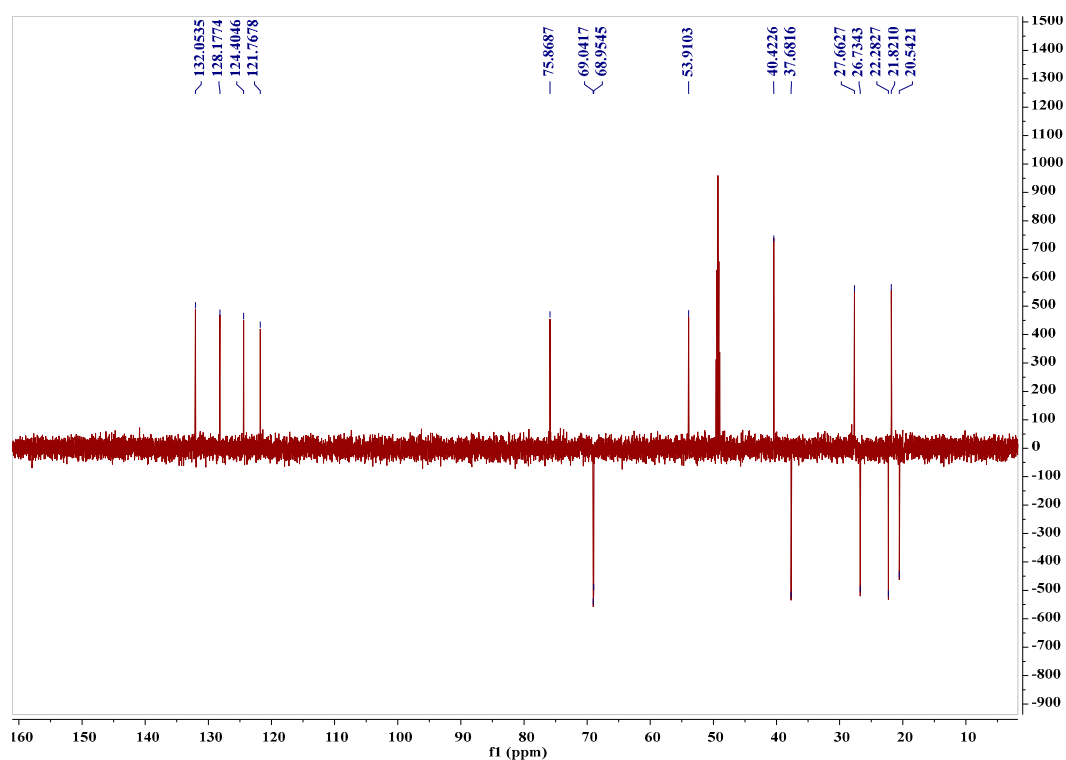

**Figure S11.**  $^{13}\text{C}$  DEPT 135 spectrum of compound **1** (150 MHz in methanol- $d_4$ ).

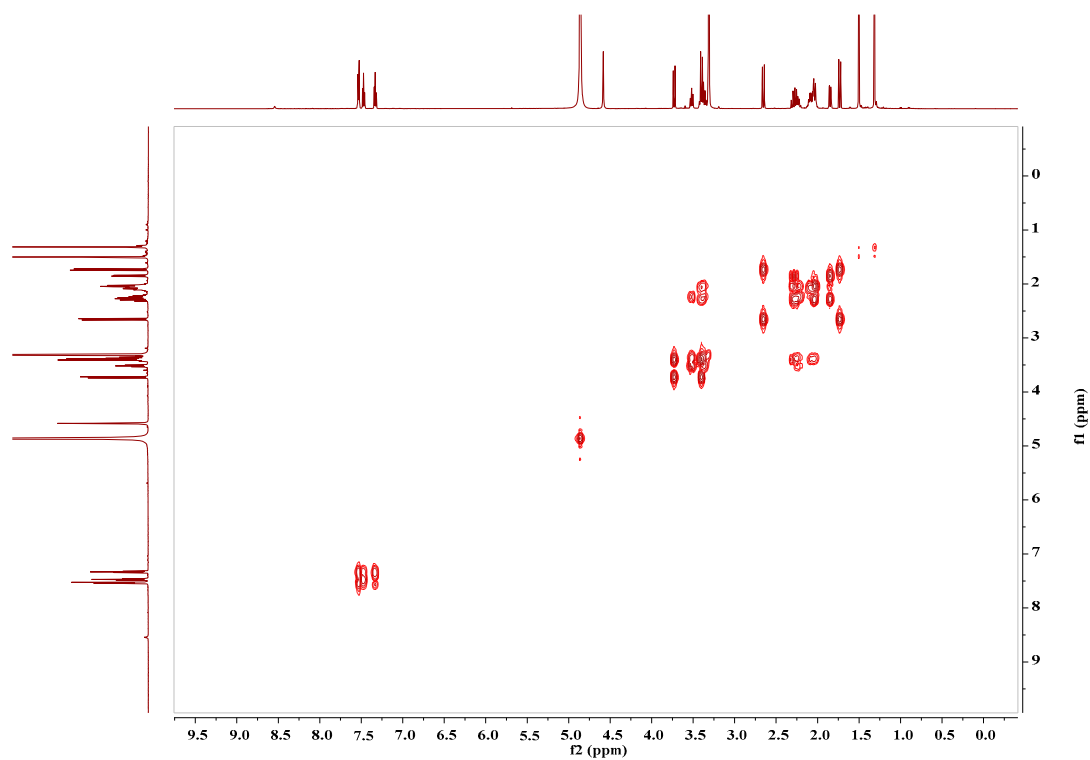

**Figure S12.**  $^1\text{H}$ - $^1\text{H}$  COSY spectrum of compound **1** (in methanol- $d_4$ ).

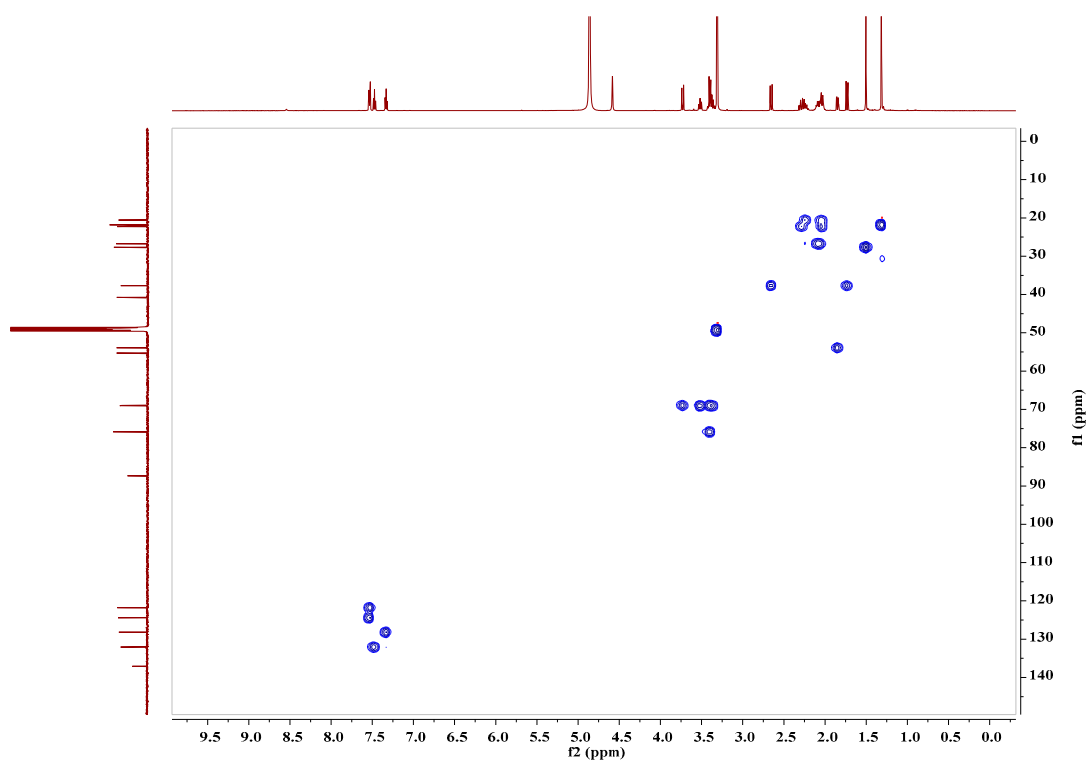

**Figure S13.** HSQC spectrum of compound **1** (in methanol- $d_4$ ).

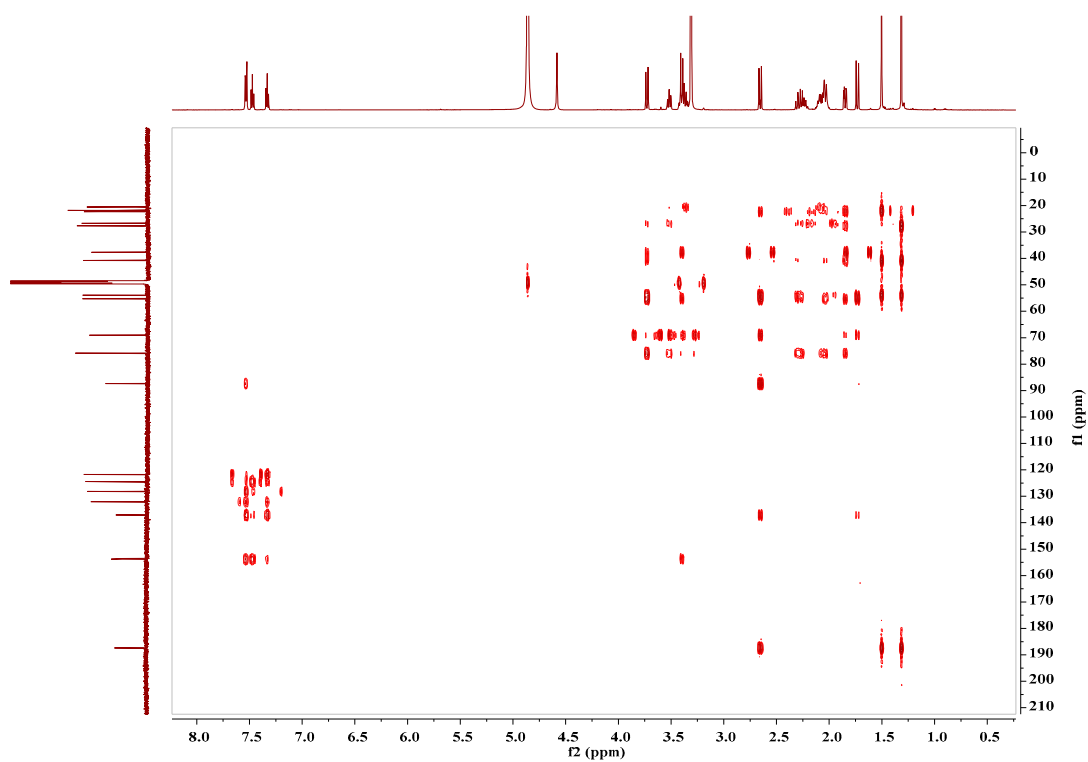

**Figure S14.** HMBC spectrum of compound **1** (in methanol- $d_4$ ).

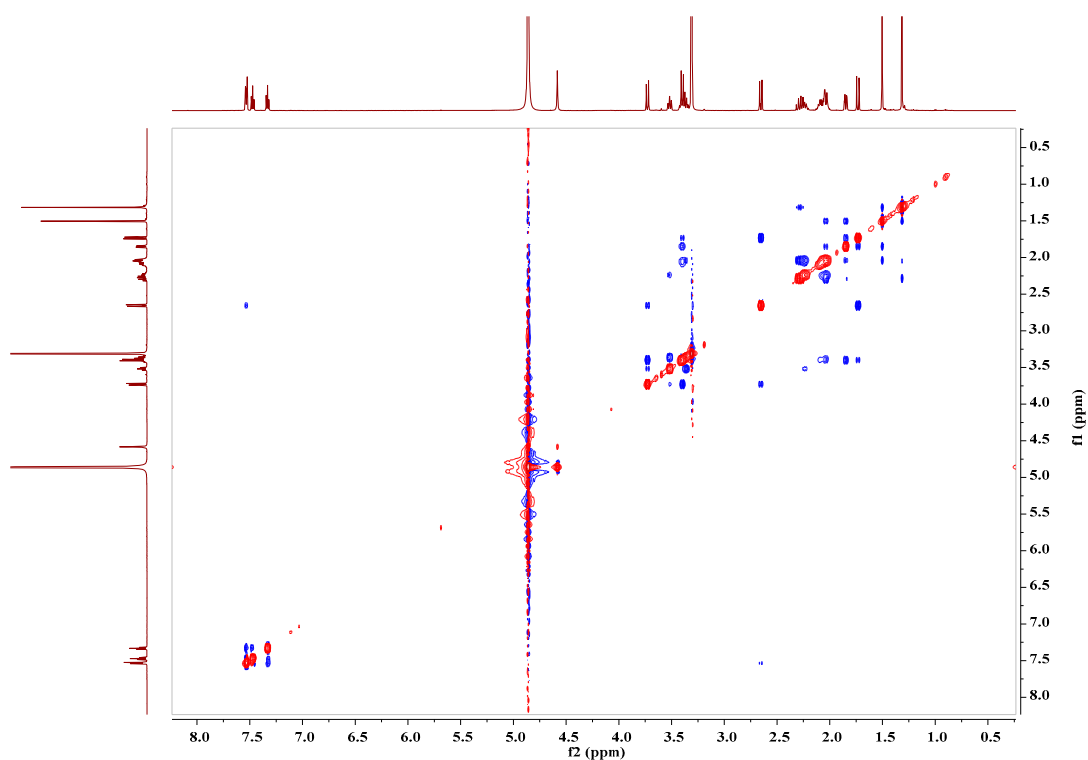

Figure S15. NOESY spectrum of compound **1** (in methanol- $d_4$ ).

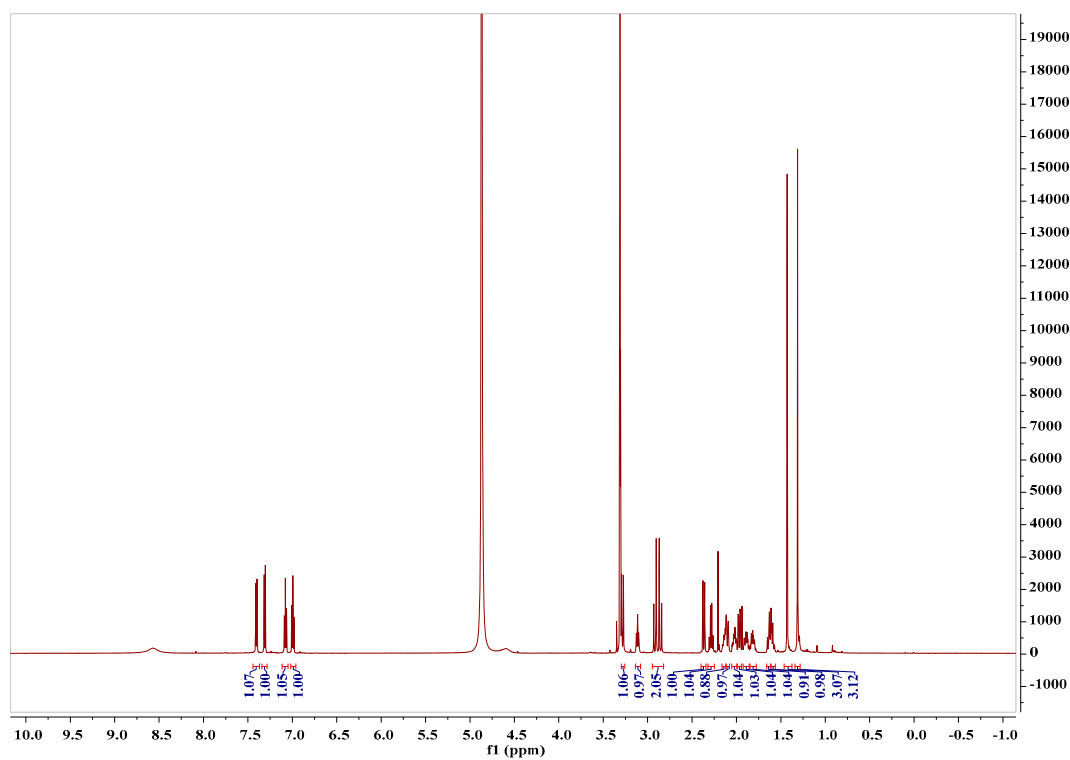

Figure S16.  $^1\text{H}$ -NMR spectrum of compound **2** (600 MHz in methanol- $d_4$ ).

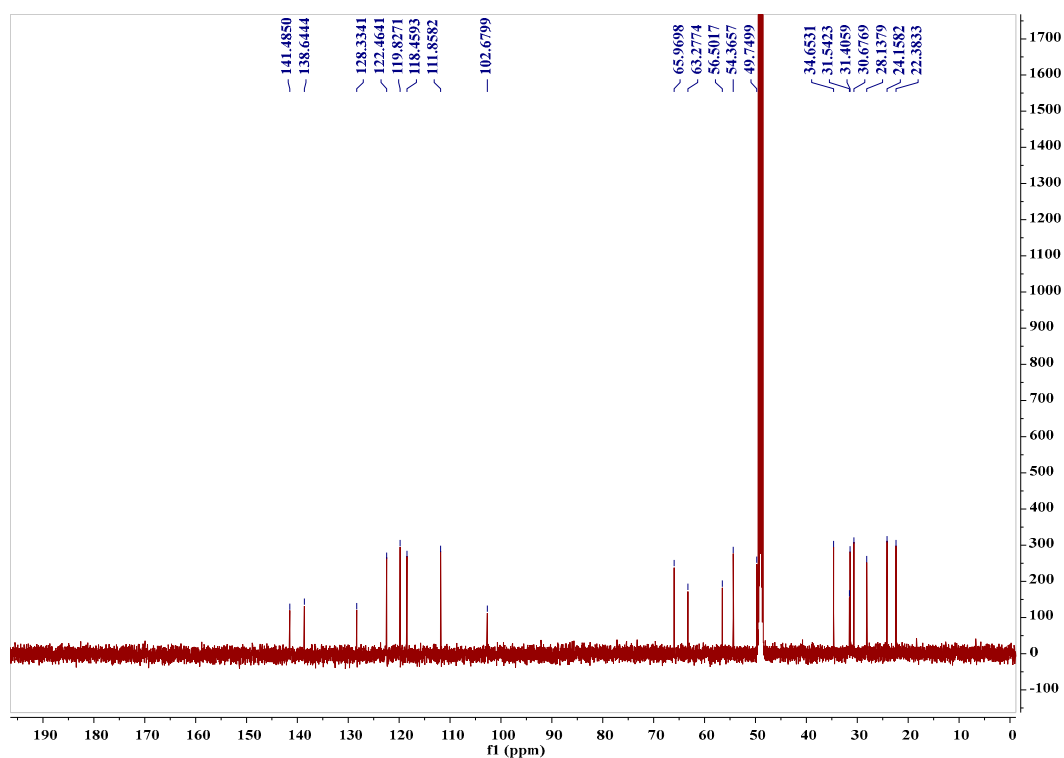

Figure S17. <sup>13</sup>C-NMR spectrum of compound 2 (150 MHz in methanol-*d*<sub>4</sub>).

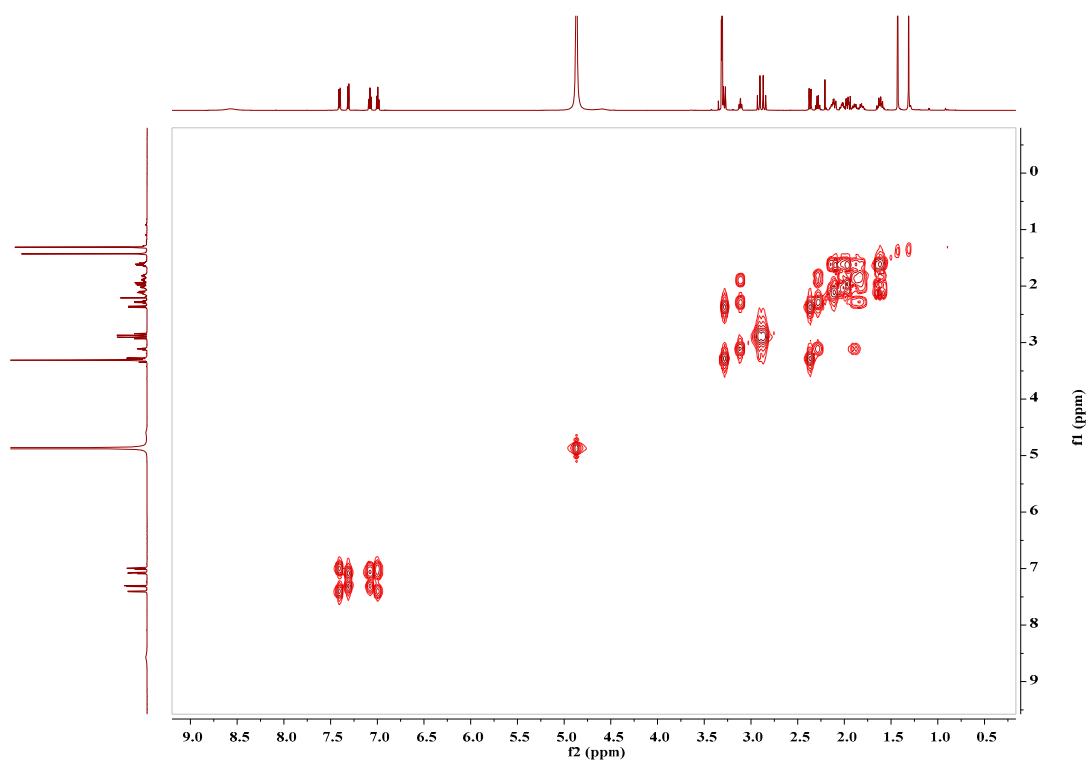

Figure S18. <sup>1</sup>H-<sup>1</sup>H COSY spectrum of compound 2 (in methanol-*d*<sub>4</sub>).

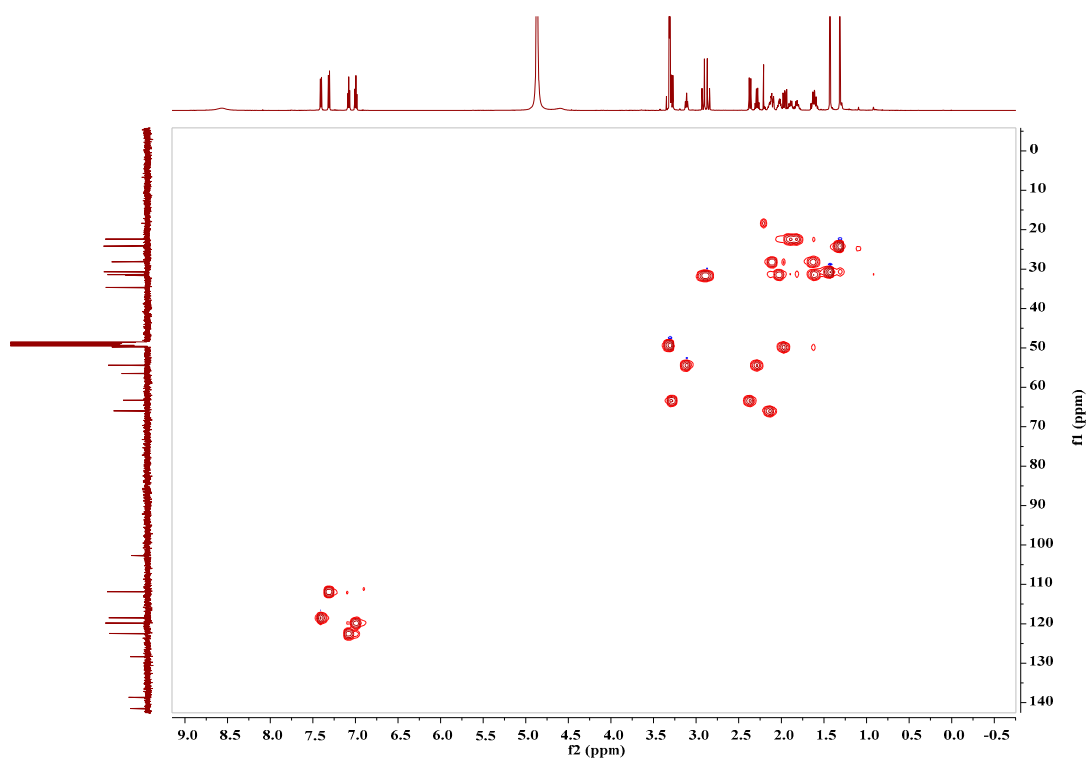

**Figure S19.** HSQC spectrum of compound **2** (in methanol- $d_4$ ).

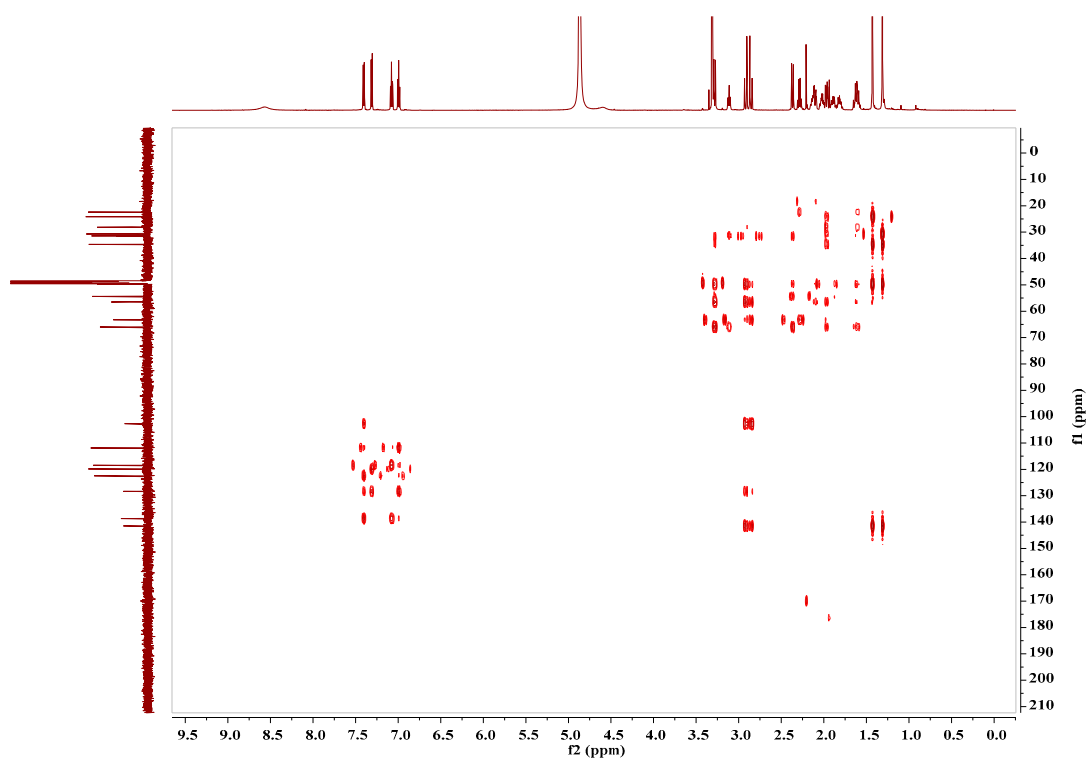

**Figure S20.** HMBC spectrum of compound **2** (in methanol- $d_4$ ).

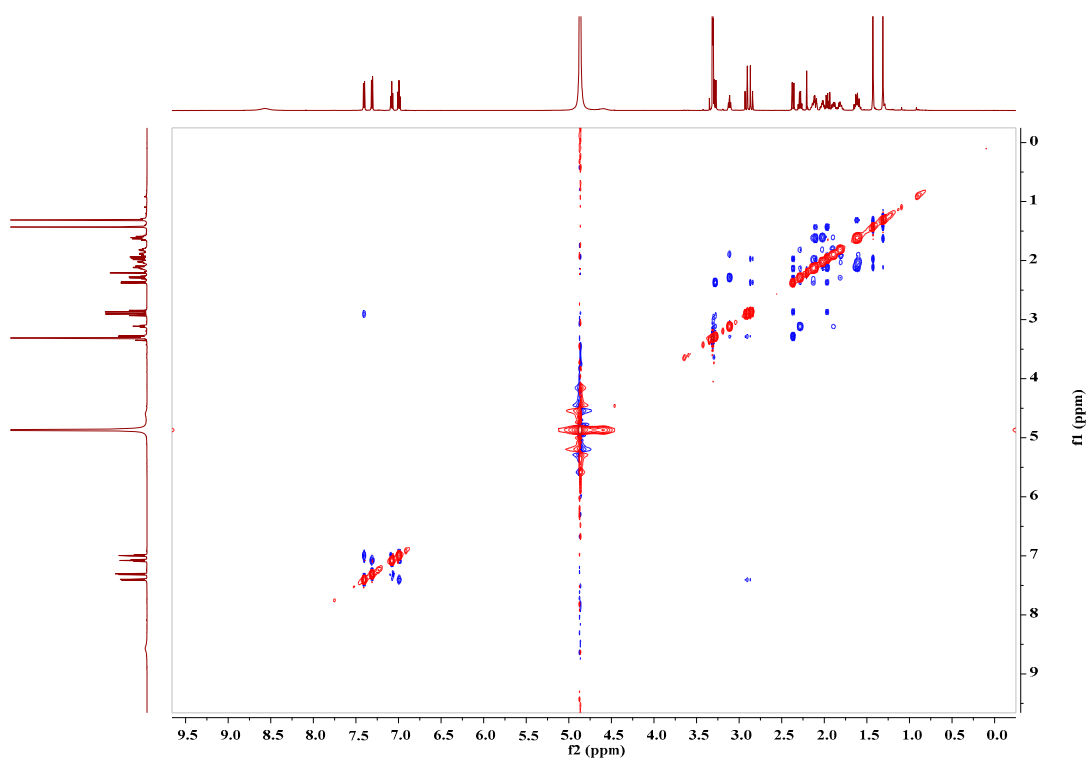

**Figure S21.** NOESY spectrum of compound **2** (in methanol- $d_4$ ).

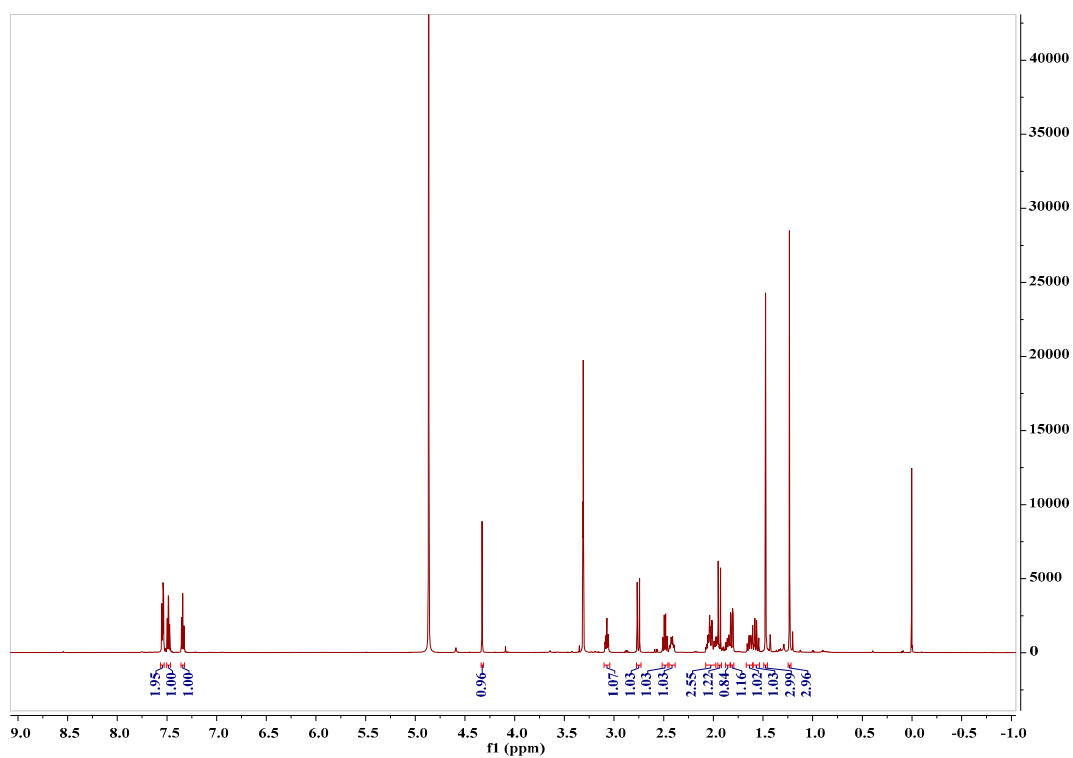

**Figure S22.**  $^1\text{H}$ -NMR spectrum of compound **3** (600 MHz in methanol- $d_4$ ).



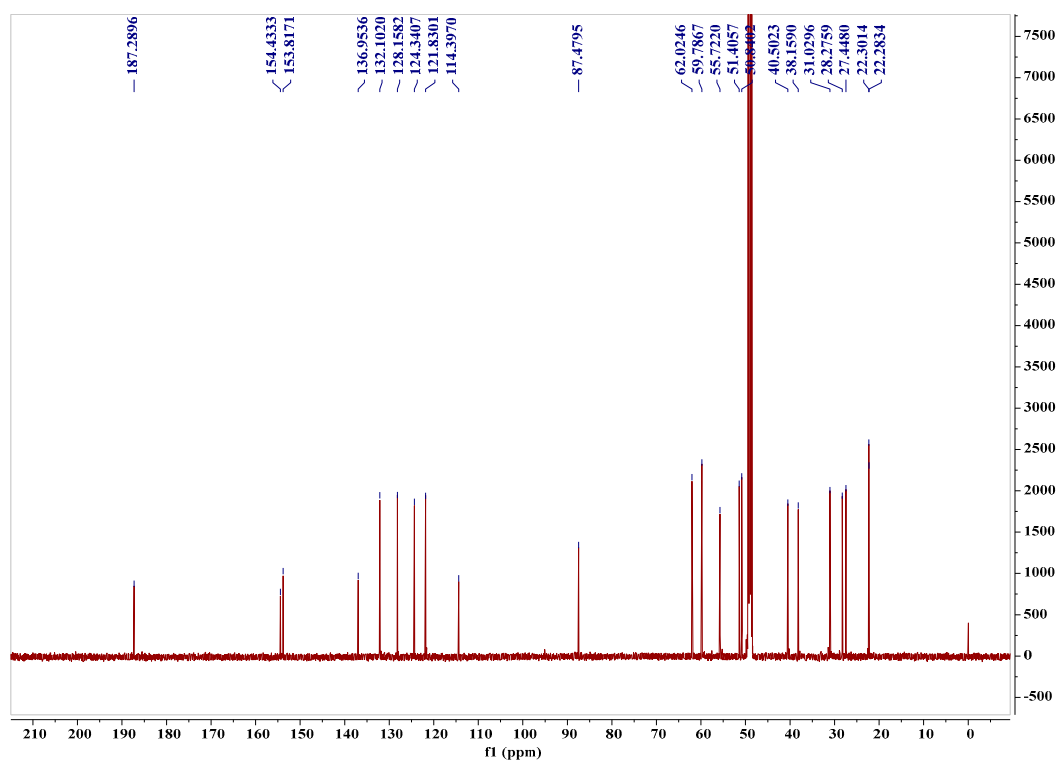

**Figure S23.** <sup>13</sup>C-NMR spectrum of compound **3** (150 MHz in methanol-*d*<sub>4</sub>).

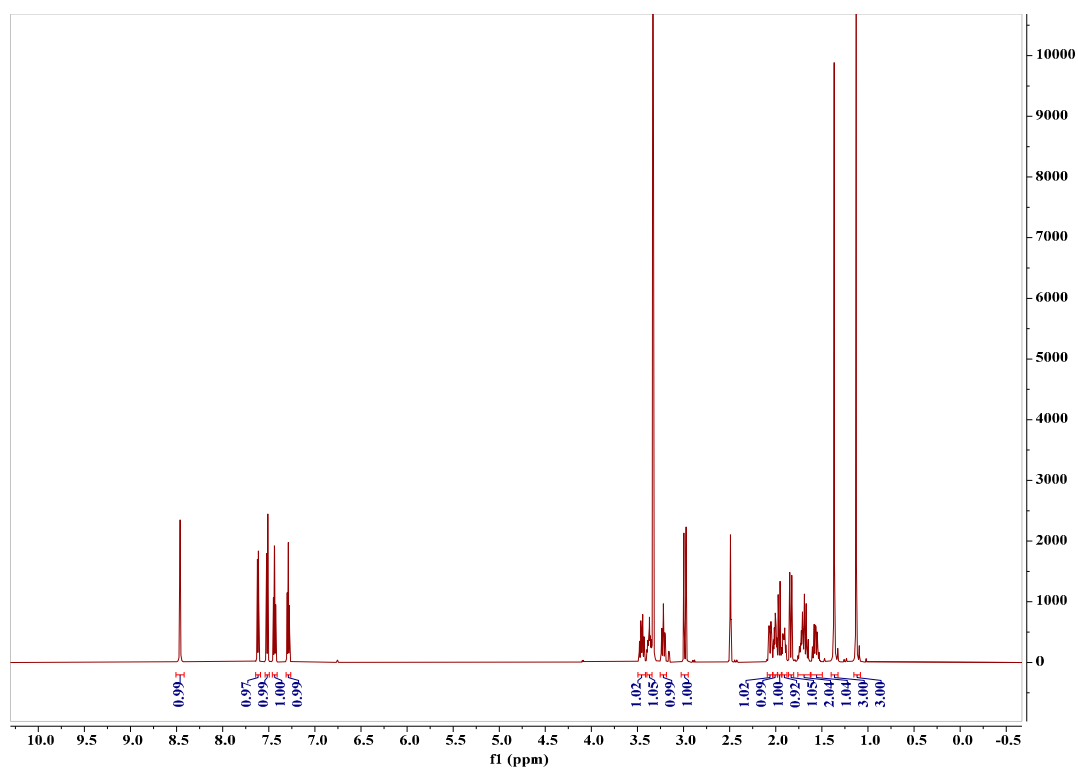

**Figure S24.** <sup>1</sup>H-NMR spectrum of compound **4** (600 MHz in DMSO-*d*<sub>6</sub>).

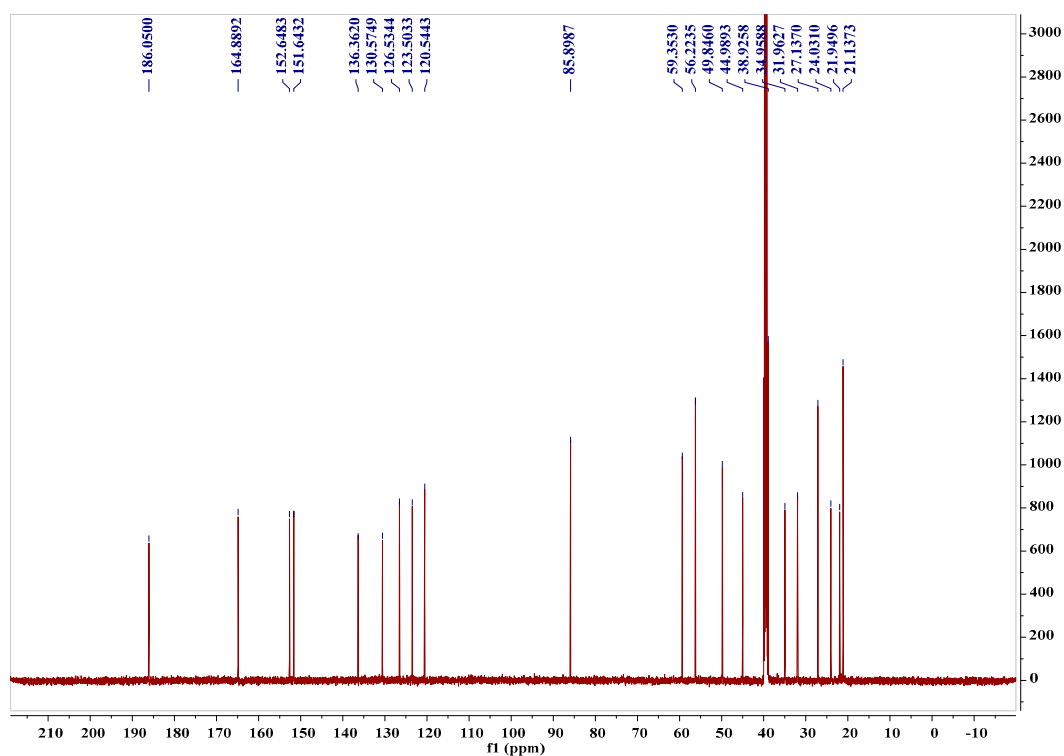

**Figure S25.**  $^{13}\text{C}$ -NMR spectrum of compound **4** (150 MHz in  $\text{DMSO-}d_6$ ).

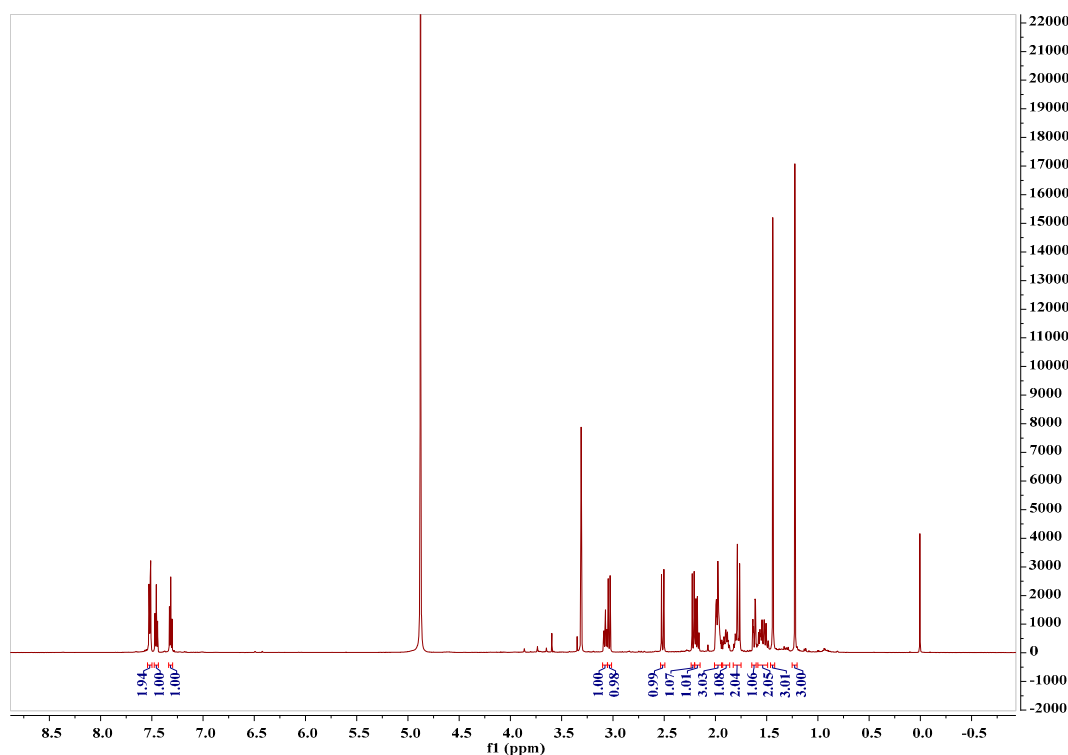

**Figure S26.**  $^1\text{H}$ -NMR spectrum of compound **5** (600 MHz in  $\text{methanol-}d_4$ ).

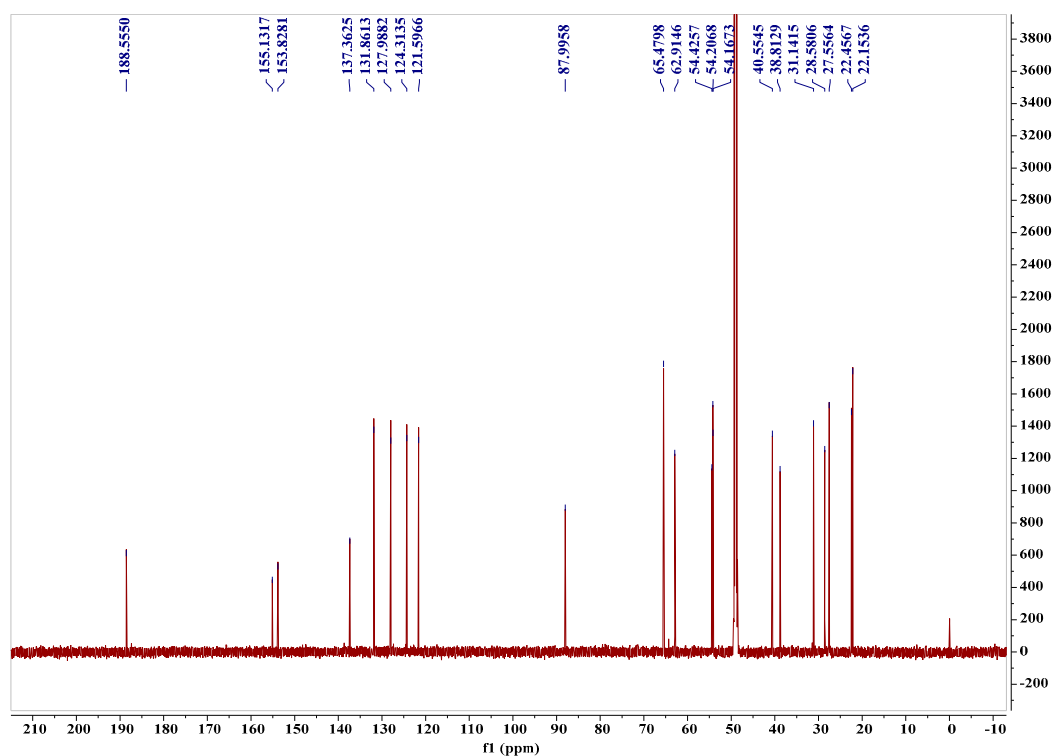

Figure S27.  $^{13}\text{C}$ -NMR spectrum of compound **5** (150 MHz in methanol- $d_4$ ).

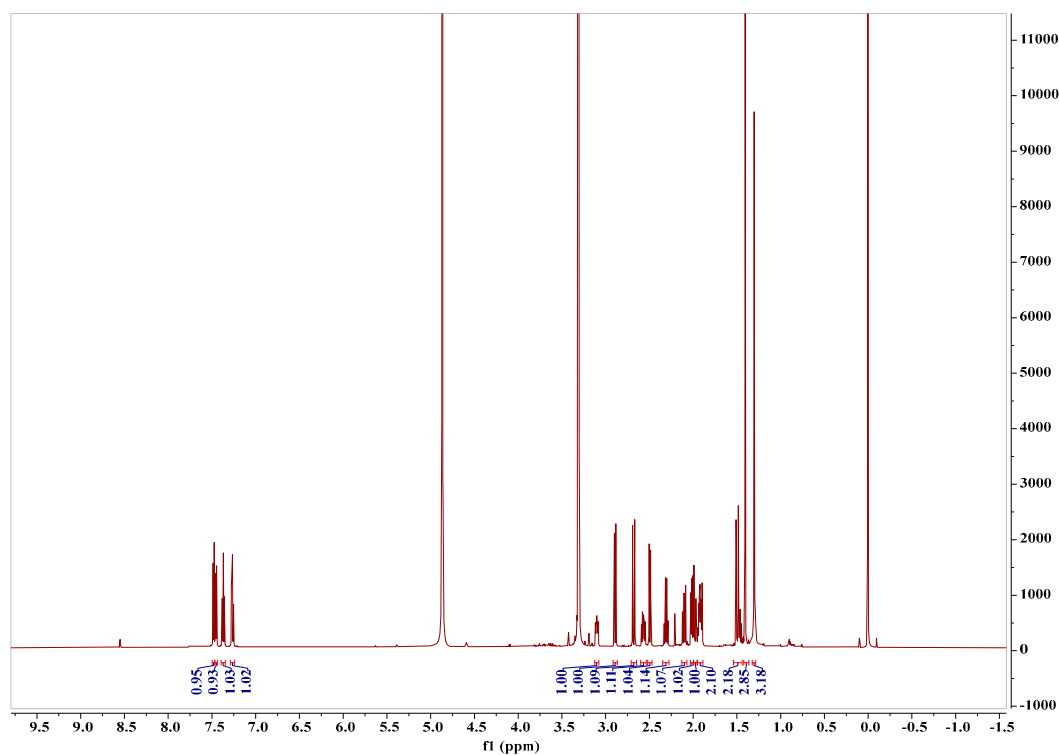

Figure S28.  $^1\text{H}$ -NMR spectrum of compound **6** (600 MHz in methanol- $d_4$ ).

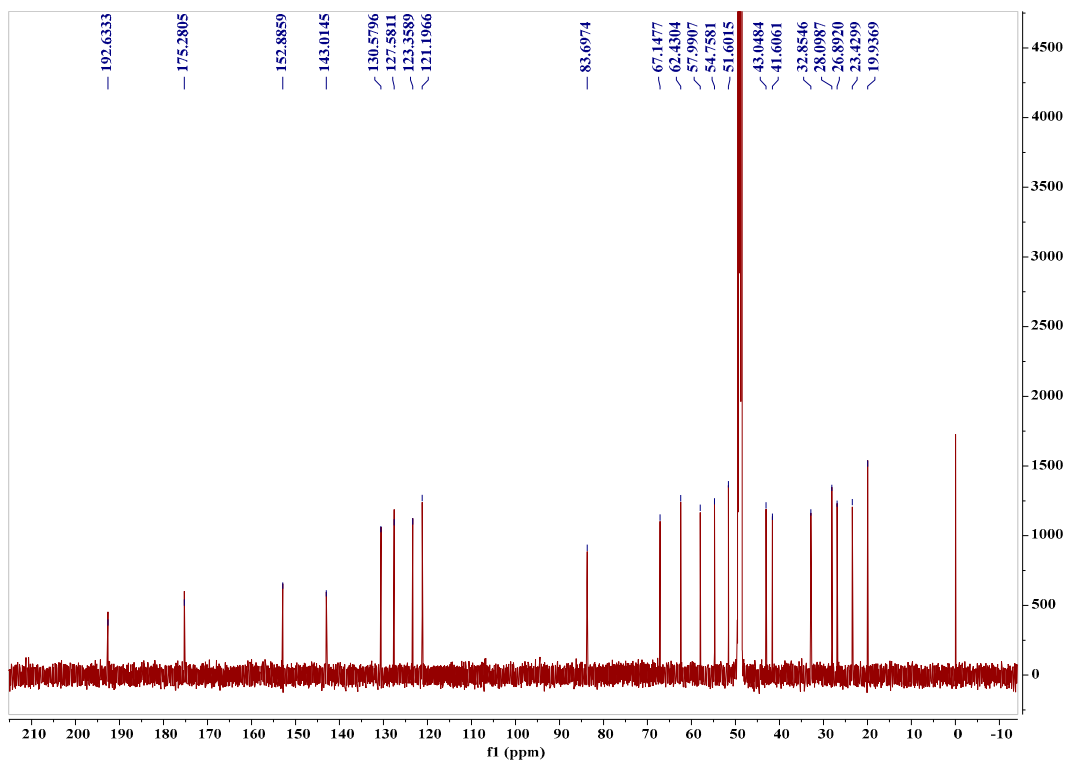

Figure S29.  $^{13}\text{C}$ -NMR spectrum of compound **6** (150 MHz in methanol- $d_4$ ).

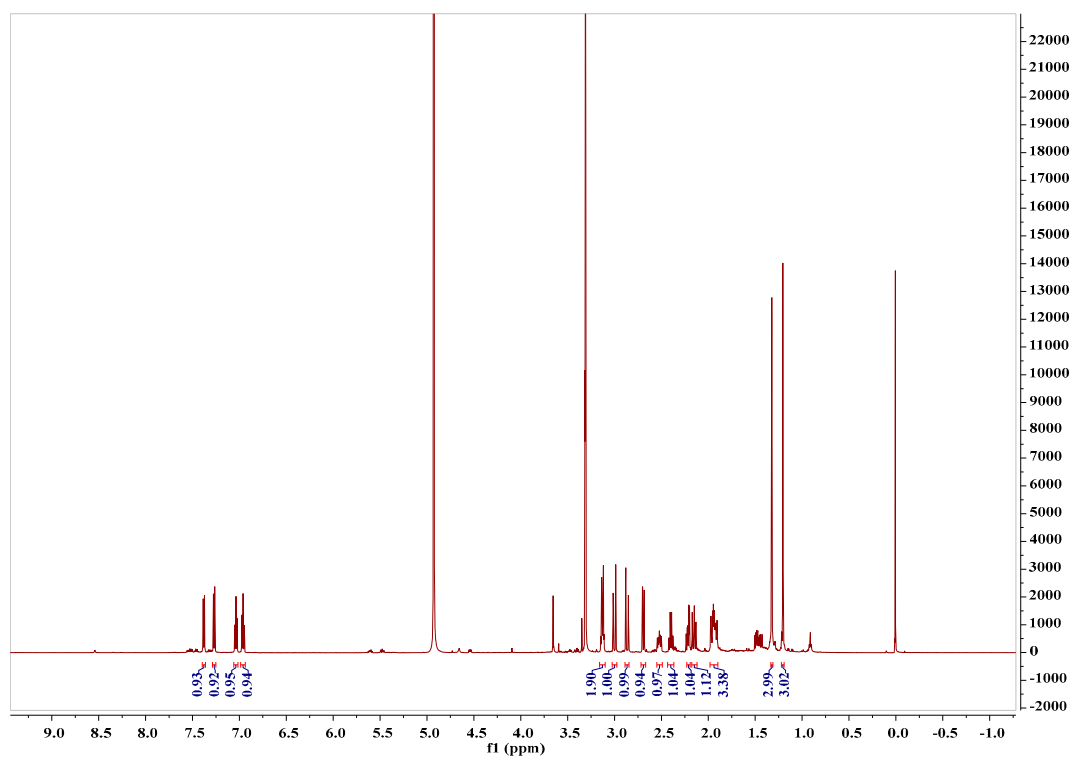

Figure S30.  $^1\text{H}$ -NMR spectrum of compound **7** (600 MHz in methanol- $d_4$ ).

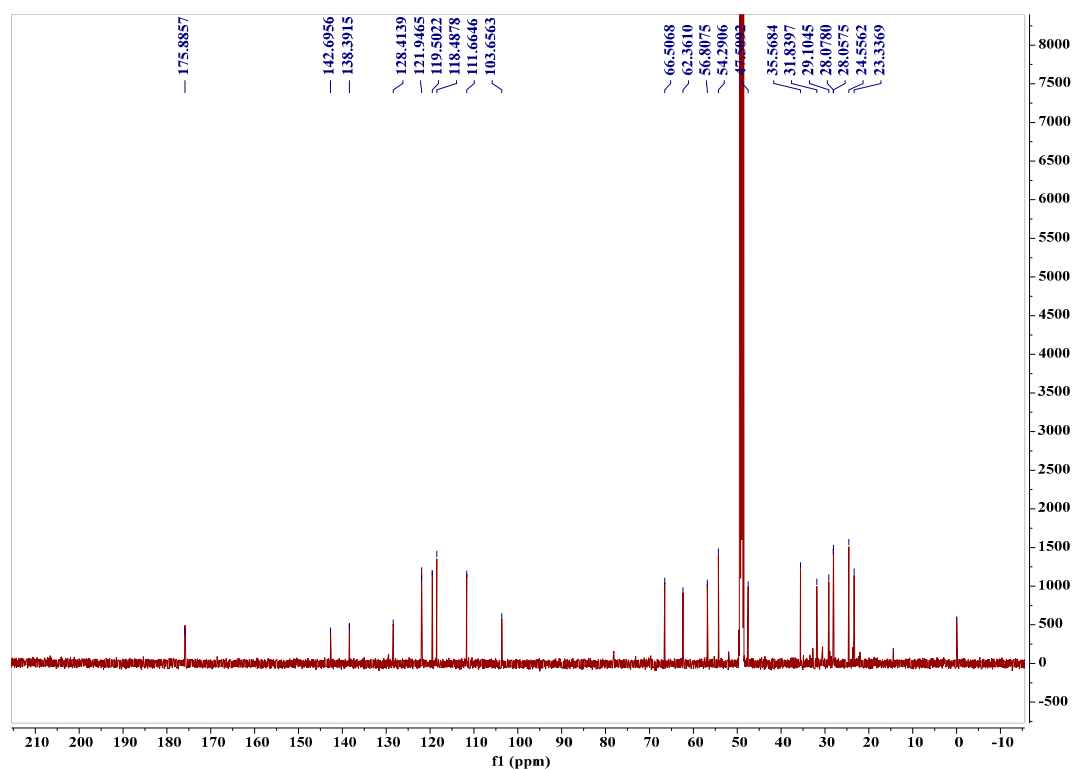

**Figure S31.** <sup>13</sup>C-NMR spectrum of compound **7** (150 MHz in methanol-*d*<sub>4</sub>).

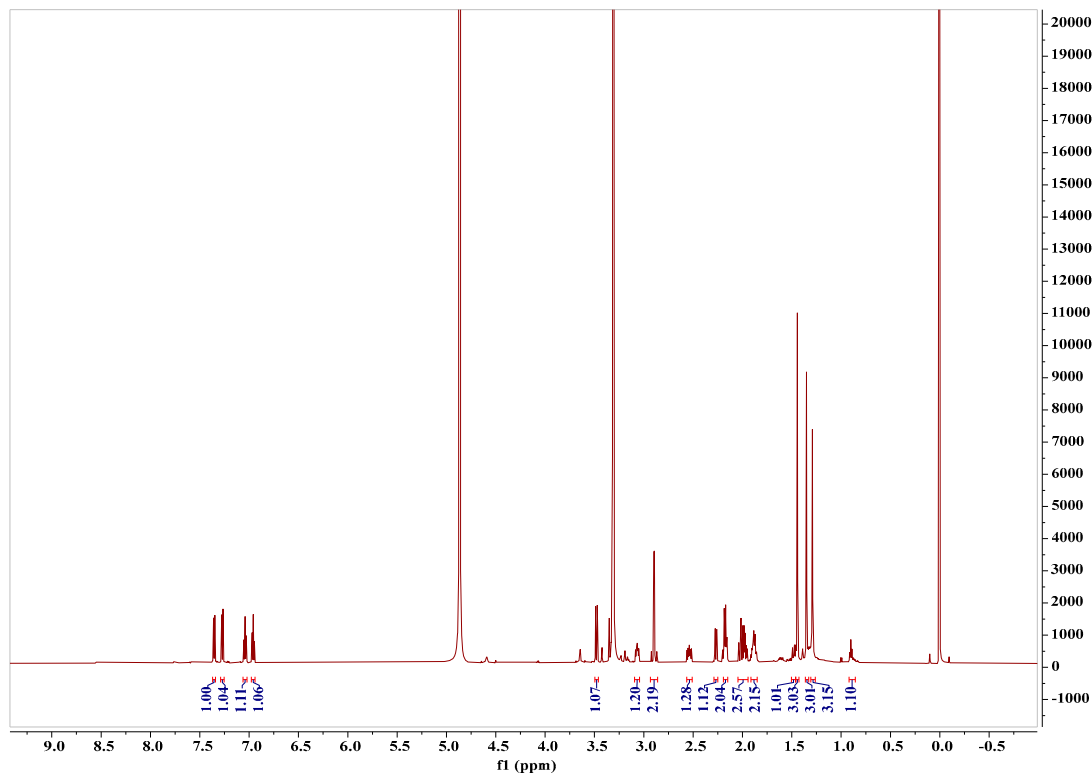

**Figure S32.** <sup>1</sup>H-NMR spectrum of compound **8** (600 MHz in methanol-*d*<sub>4</sub>).

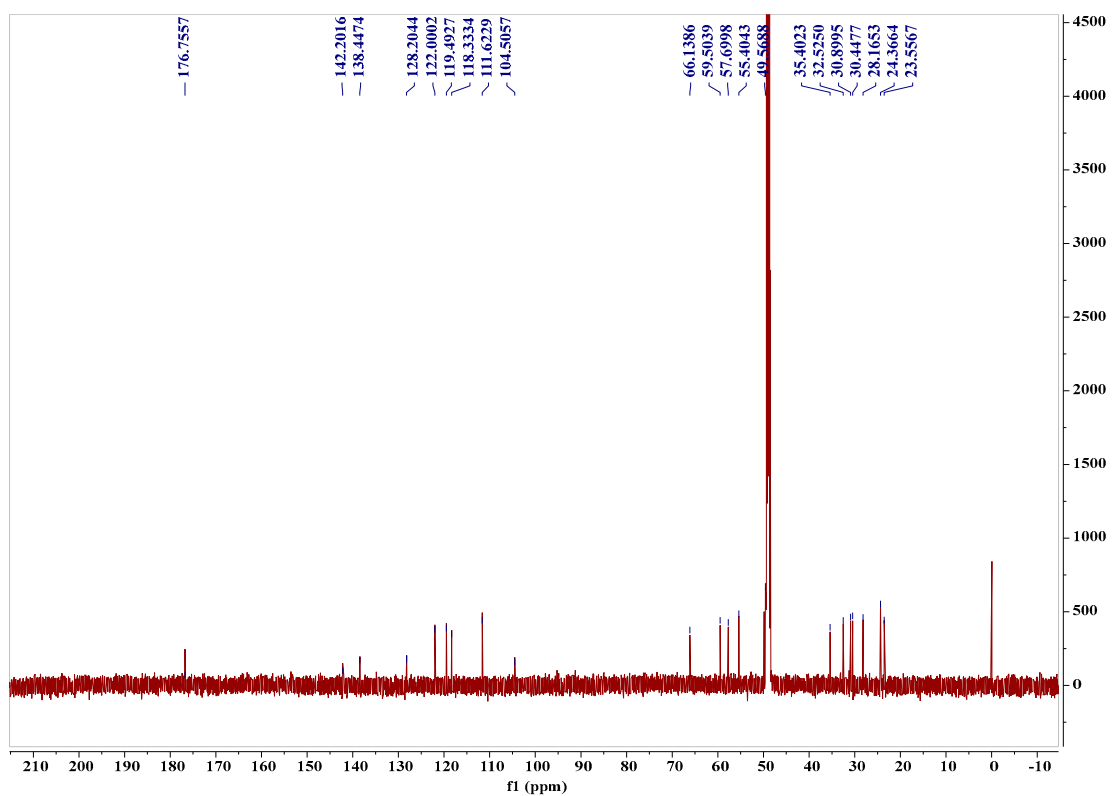

**Figure S33.** <sup>13</sup>C-NMR spectrum of compound **8** (150 MHz in methanol-*d*<sub>4</sub>).

**Table S1.**  $^1\text{H}$ -NMR (600 MHz) and  $^{13}\text{C}$ -NMR (150 MHz) data for compound **3** and **4**.

| No.         | Compound <b>3</b> (in methanol- $d_4$ ) |                                        | Compound <b>4</b> (in DMSO- $d_6$ ) |                                         |
|-------------|-----------------------------------------|----------------------------------------|-------------------------------------|-----------------------------------------|
|             | $\delta_{\text{C}}$                     | $\delta_{\text{H}}$ (mult., $J$ in Hz) | $\delta_{\text{C}}$                 | $\delta_{\text{H}}$ (mult., $J$ in Hz)  |
| 2           | 187.3                                   |                                        | 186.1                               |                                         |
| 3           | 40.5                                    |                                        | 38.9                                |                                         |
| 4           | 50.8                                    | 1.81 (1H, dd, $J = 12.5, 3.6$ Hz)      | 49.9                                | 1.96 (1H, dd, $J = 12.6, 1.8$ Hz)       |
| 5 $\alpha$  | 27.5                                    | 1.57 (1H, m)                           | 24.0                                | 1.68 (1H, m)                            |
| 5 $\beta$   |                                         | 2.02 (1H, m)                           |                                     | 2.06 (1H, ddd, $J = 13.0, 4.3, 1.9$ Hz) |
| 6           | 59.8                                    | 2.42 (1H, m)                           | 59.4                                | 3.37 (1H, m)                            |
| 7 $\alpha$  | 31.0                                    | 1.63 (1H, m)                           | 32.0                                | 1.57 (1H, qd, $J = 11.6, 1.8$ Hz)       |
| 7 $\beta$   |                                         | 2.06 (1H, m)                           |                                     | 2.01 (1H, m)                            |
| 8 $\alpha$  | 22.3                                    | 1.85 (1H, m)                           | 22.0                                | 1.91 (1H, m)                            |
| 8 $\beta$   |                                         | 1.98 (1H, m)                           |                                     | 1.72 (1H, m)                            |
| 9 $\alpha$  | 51.4                                    | 2.49 (1H, q, $J = 8.8$ Hz)             | 45.0                                | 3.45 (1H, dt, $J = 12.4, 8.8$ Hz)       |
| 9 $\beta$   |                                         | 3.07 (1H, td, $J = 8.7, 2.8$ Hz)       |                                     | 3.22 (1H, m)                            |
| 11          | 62.0                                    | 4.33 (1H, s)                           | 164.9                               |                                         |
| 12          | 55.7                                    |                                        | 56.2                                |                                         |
| 13 $\alpha$ | 38.2                                    | 1.94 (1H, d, $J = 13.7$ Hz)            | 35.0                                | 2.98 (1H, d, $J = 13.7$ Hz)             |
| 13 $\beta$  |                                         | 2.75 (1H, d, $J = 13.7$ Hz)            |                                     | 1.84 (1H, dd, $J = 13.7, 1.4$ Hz)       |
| 14          | 87.5                                    |                                        | 85.9                                |                                         |
| 15          | 137.0                                   |                                        | 136.4                               |                                         |
| 16          | 124.3                                   | 7.54 (1H, br d, $J = 7.5$ Hz)          | 123.5                               | 7.62 (1H, br d, $J = 7.1$ Hz)           |
| 17          | 128.2                                   | 7.34 (1H, td, $J = 7.4, 1.0$ Hz)       | 126.5                               | 7.29 (1H, td, $J = 7.4, 1.0$ Hz)        |
| 18          | 132.1                                   | 7.49 (1H, td, $J = 7.6, 1.1$ Hz)       | 130.6                               | 7.44 (1H, td, $J = 7.6, 1.3$ Hz)        |
| 19          | 121.8                                   | 7.55 (1H, br d, $J = 7.8$ Hz)          | 120.5                               | 7.52 (1H, br d, $J = 7.6$ Hz)           |
| 20          | 154.4                                   |                                        | 152.7                               |                                         |
| 21          | 22.3                                    | 1.23 (3H, s)                           | 27.1                                | 1.36 (3H, s)                            |
| 22          | 28.3                                    | 1.47 (3H, s)                           | 21.1                                | 1.13 (3H, s)                            |
| 23          | 114.4                                   |                                        | 151.6                               |                                         |
| 25          | 153.8                                   |                                        |                                     |                                         |

**Table S2.**  $^1\text{H}$ -NMR (600 MHz) and  $^{13}\text{C}$ -NMR (150 MHz) data for compound **5** (in methanol- $d_4$ ).

| No.         | $\delta_{\text{C}}$ | $\delta_{\text{H}}$ (mult., $J$ in Hz) |
|-------------|---------------------|----------------------------------------|
| 2           | 188.6               |                                        |
| 3           | 40.6                |                                        |
| 4           | 54.1                | 1.62 (1H, dd, $J = 12.4, 3.1$ Hz)      |
| 5 $\alpha$  | 28.6                | 1.51 (1H, td, $J = 13.0, 10.4$ Hz)     |
| 5 $\beta$   |                     | 2.00-1.94 (1H, m)                      |
| 6           | 65.5                | 2.00-1.94 (1H, m)                      |
| 7 $\alpha$  | 31.1                | 1.59-1.54 (1H, m)                      |
| 7 $\beta$   |                     | 2.00-1.94 (1H, m)                      |
| 8 $\alpha$  | 22.5                | 1.93-1.86 (1H, m)                      |
| 8 $\beta$   |                     | 1.83-1.76 (1H, m)                      |
| 9 $\alpha$  | 54.2                | 3.07 (1H, td, $J = 8.7, 2.2$ Hz)       |
| 9 $\beta$   |                     | 2.18 (1H, q, $J = 8.9$ Hz)             |
| 11 $\alpha$ | 62.9                | 3.04 (1H, d, $J = 11.2$ Hz)            |
| 11 $\beta$  |                     | 2.22 (1H, d, $J = 11.2$ Hz)            |
| 12          | 54.4                |                                        |
| 13 $\alpha$ | 38.8                | 2.52 (1H, d, $J = 13.9$ Hz)            |
| 13 $\beta$  |                     | 1.77 (1H, d, $J = 14.1$ Hz)            |
| 14          | 88.0                |                                        |
| 15          | 137.4               |                                        |
| 16          | 124.3               | 7.521 (1H, br d, $J = 7.3$ Hz)         |
| 17          | 128.0               | 7.31 (1H, td, $J = 7.6, 1.0$ Hz)       |
| 18          | 131.9               | 7.46 (1H, td, $J = 7.6, 0.9$ Hz)       |
| 19          | 121.6               | 7.517 (1H, br d, $J = 7.4$ Hz)         |
| 20          | 153.8               |                                        |
| 21          | 27.6                | 1.44 (3H, s)                           |
| 22          | 22.2                | 1.22 (3H, s)                           |
| 23          | 155.1               |                                        |



**Table S3.**  $^1\text{H}$ -NMR (600 MHz) and  $^{13}\text{C}$ -NMR (150 MHz) data for compound **6** (in methanol- $d_4$ )

| No.         | $\delta_{\text{C}}$ | $\delta_{\text{H}}$ (mult., $J$ in Hz) |
|-------------|---------------------|----------------------------------------|
| 2           | 192.6               |                                        |
| 3           | 41.6                |                                        |
| 4           | 51.6                | 2.00 (1H, dd, $J = 9.3, 5.0$ Hz)       |
| 5 $\alpha$  | 32.9                | 2.10 (1H, dd, $J = 12.7, 9.2$ Hz)      |
| 5 $\beta$   |                     | 1.98 (1H, dd, $J = 12.7, 5.1$ Hz)      |
| 6           | 67.2                |                                        |
| 7 $\alpha$  | 28.1                | 2.57 (1H, dt, $J = 14.3, 6.5$ Hz)      |
| 7 $\beta$   |                     | 1.47 (1H, td, $J = 12.7, 9.0$ Hz)      |
| 8           | 23.4                | 1.92 (2H, m)                           |
| 9 $\alpha$  | 54.7                | 3.10 (1H, dt, $J = 11.4, 5.3$ Hz)      |
| 9 $\beta$   |                     | 2.31 (1H, q, $J = 8.8$ Hz)             |
| 11 $\alpha$ | 62.4                | 2.89 (1H, d, $J = 10.3$ Hz)            |
| 11 $\beta$  |                     | 2.49 (1H, d, $J = 10.3$ Hz)            |
| 12          | 58.0                |                                        |
| 13 $\alpha$ | 43.1                | 2.68 (1H, d, $J = 14.9$ Hz)            |
| 13 $\beta$  |                     | 1.49 (1H, d, $J = 14.9$ Hz)            |
| 14          | 83.7                |                                        |
| 15          | 143.0               |                                        |
| 16          | 123.3               | 7.45 (1H, br d, $J = 7.3$ Hz)          |
| 17          | 127.6               | 7.26 (1H, td, $J = 7.4, 1.0$ Hz)       |
| 18          | 130.6               | 7.37 (1H, td, $J = 7.6, 1.3$ Hz)       |
| 19          | 121.2               | 7.48 (1H, br d, $J = 7.7$ Hz)          |
| 20          | 152.9               |                                        |
| 21          | 26.9                | 1.30 (3H, s)                           |
| 22          | 19.9                | 1.41 (3H, s)                           |
| 23          | 175.3               |                                        |

**Table S4.** <sup>1</sup>H-NMR (600 MHz) and <sup>13</sup>C-NMR (150 MHz) data for compound **7** and **8**.

| No. | Compound <b>7</b> (in methanol- <i>d</i> <sub>4</sub> ) |                                              | Compound <b>8</b> (in methanol- <i>d</i> <sub>4</sub> ) |                                         |
|-----|---------------------------------------------------------|----------------------------------------------|---------------------------------------------------------|-----------------------------------------|
|     | δ <sub>C</sub>                                          | δ <sub>H</sub> (mult., <i>J</i> in Hz)       | δ <sub>C</sub>                                          | δ <sub>H</sub> (mult., <i>J</i> in Hz)  |
| 2   | 142.7                                                   |                                              | 142.2                                                   |                                         |
| 3   | 31.8                                                    |                                              | 35.4                                                    |                                         |
| 4   | 47.5                                                    | 2.21 (1H, dd, <i>J</i> = 10.1, 3.8 Hz)       | 48.8                                                    | 2.17 (1H, dd, <i>J</i> = 10.9, 3.2 Hz)  |
| 5α  |                                                         | 2.15 (1H, dd, <i>J</i> = 13.6, 10.1 Hz)      |                                                         | 2.06 (1H, dd, <i>J</i> = 13.1, 10.9 Hz) |
| 5β  | 31.8                                                    | 1.96 (1H, dd, <i>J</i> = 13.6, 3.8 Hz)       | 32.5                                                    | 1.97 (1H, dd, <i>J</i> = 13.2, 5.1 Hz)  |
| 6   | 66.5                                                    |                                              | 66.1                                                    |                                         |
| 7α  |                                                         | 2.52 (1H, ddd, <i>J</i> = 13.9, 8.2, 5.1 Hz) |                                                         | 2.54 (1H, m)                            |
|     | 28.1                                                    |                                              | 28.2                                                    |                                         |
| 7β  |                                                         | 1.48 (1H, m)                                 |                                                         | 1.47 (1H, m)                            |
| 8   | 23.3                                                    | 1.94-1.90 (2H, m)                            | 23.6                                                    | 1.91-1.96 (2H, m)                       |
| 9α  |                                                         | 3.13 (1H, m)                                 |                                                         | 3.07 (1H, m)                            |
| 9β  | 54.3                                                    | 2.40 (1H, q, <i>J</i> = 8.7 Hz)              | 55.4                                                    | 2.18 (1H, br q, <i>J</i> = 8.8 Hz)      |
| 11α |                                                         | 3.12 (1H, d, <i>J</i> = 10.6 Hz)             |                                                         | 3.48 (1H, d, <i>J</i> = 10.3 Hz)        |
| 11β | 62.4                                                    | 2.69 (1H, d, <i>J</i> = 10.4 Hz)             | 59.5                                                    | 2.27 (1H, dd, <i>J</i> = 10.3, 1.8 Hz)  |
| 12  | 56.8                                                    |                                              | 57.7                                                    |                                         |
| 13α |                                                         | 3.00 (1H, d, <i>J</i> = 16.9 Hz)             |                                                         | 2.91 (1H, d, <i>J</i> = 15.4 Hz)        |
| 13β | 29.1                                                    | 2.87 (1H, d, <i>J</i> = 16.9 Hz)             | 30.5                                                    | 2.88 (1H, d, <i>J</i> = 15.4 Hz)        |
| 14  | 103.7                                                   |                                              | 104.5                                                   |                                         |
| 15  | 128.4                                                   |                                              | 128.2                                                   |                                         |
| 16  | 118.5                                                   | 7.38 (1H, br d, <i>J</i> = 7.7 Hz)           | 118.3                                                   | 7.35 (1H, br d, <i>J</i> = 7.7 Hz)      |
| 17  | 119.5                                                   | 6.96 (1H, td, <i>J</i> = 7.0, 1.1 Hz)        | 119.5                                                   | 6.96 (1H, td, <i>J</i> = 7.0, 1.0 Hz)   |
| 18  | 122.0                                                   | 7.04 (1H, td, <i>J</i> = 7.1, 1.2 Hz)        | 122.0                                                   | 7.04 (1H, td, <i>J</i> = 7.1, 1.1 Hz)   |
| 19  | 111.7                                                   | 7.27 (1H, br d, <i>J</i> = 8.0 Hz)           | 111.6                                                   | 7.27 (1H, br d, <i>J</i> = 8.0 Hz)      |
| 20  | 138.4                                                   |                                              | 138.5                                                   |                                         |
| 21  | 28.1                                                    | 1.32 (3H, s)                                 | 24.4                                                    | 1.44 (3H, s)                            |
| 22  | 24.6                                                    | 1.21 (3H, s)                                 | 30.9                                                    | 1.35 (3H, s)                            |
| 23  | 175.9                                                   |                                              | 176.8                                                   |                                         |

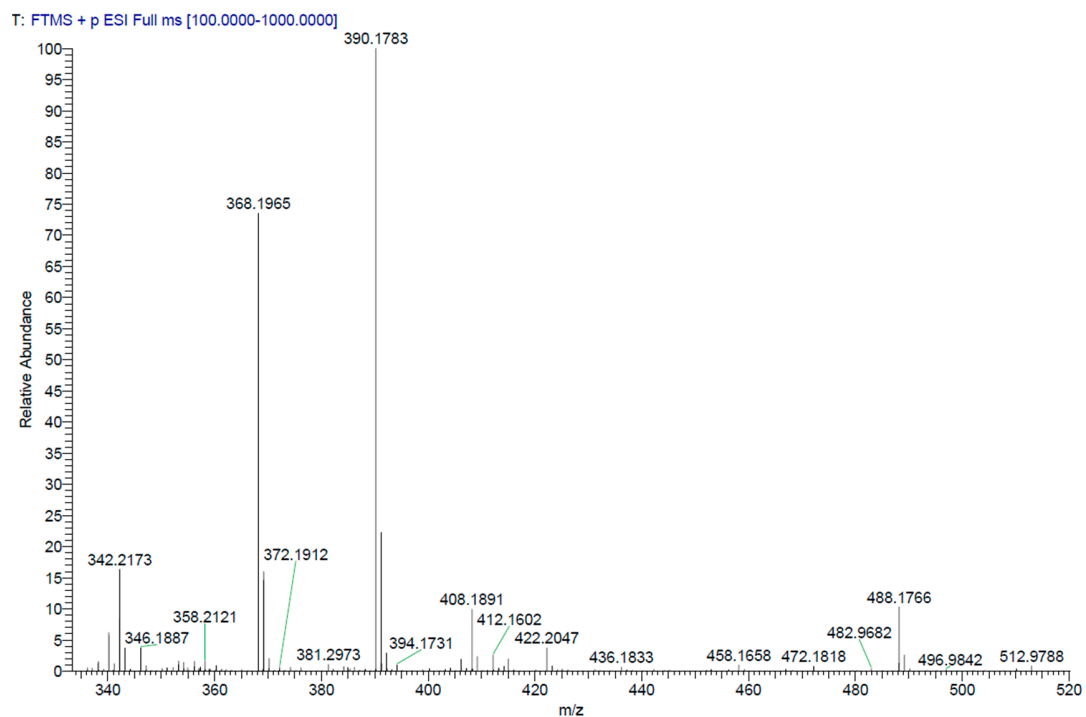

**Figure S34.** (+) HR-ESI-MS spectrum of compound **1**.

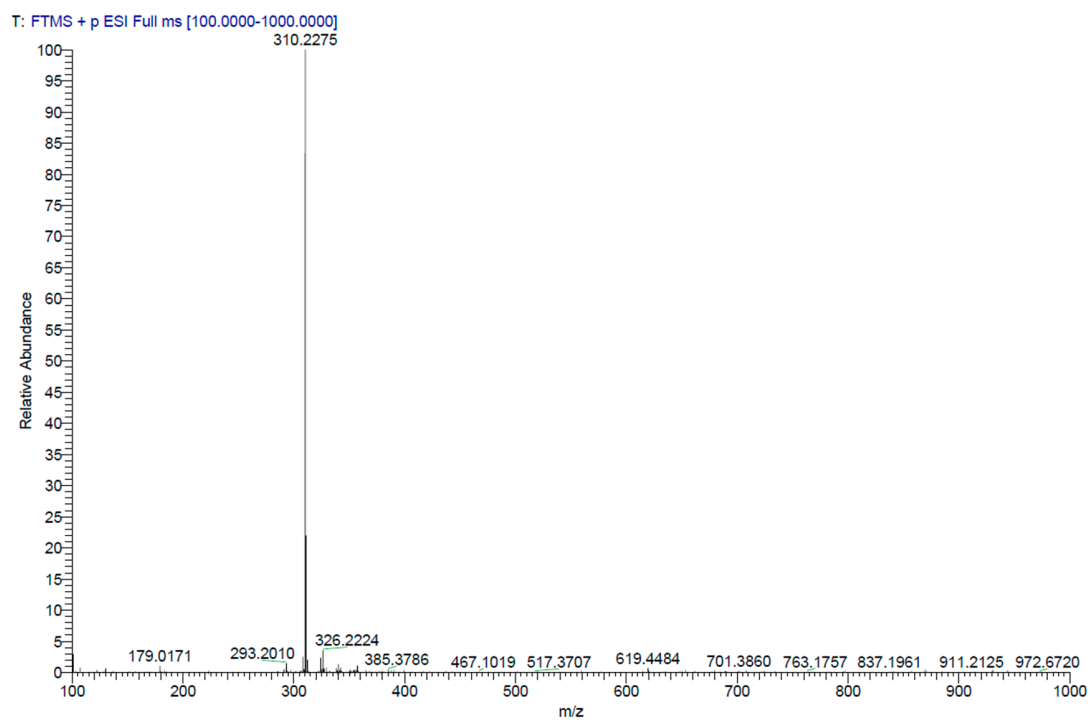

**Figure S35.** (+) HR-ESI-MS spectrum of compound **2**.

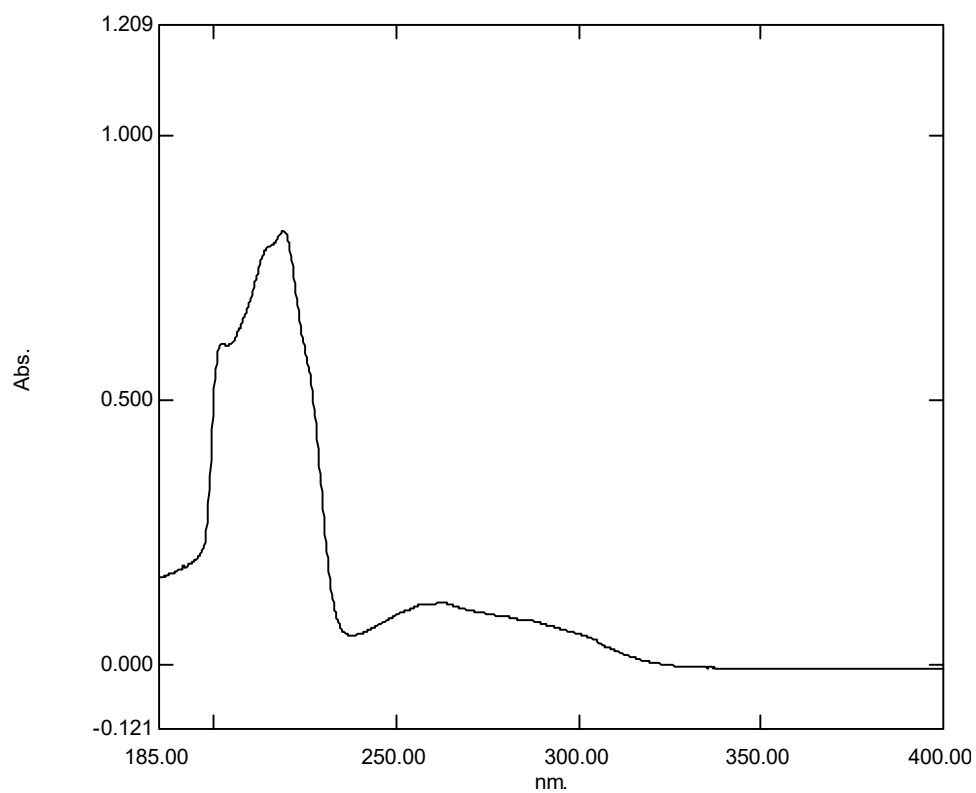

**Figure S36.** UV spectrum of compound 1.

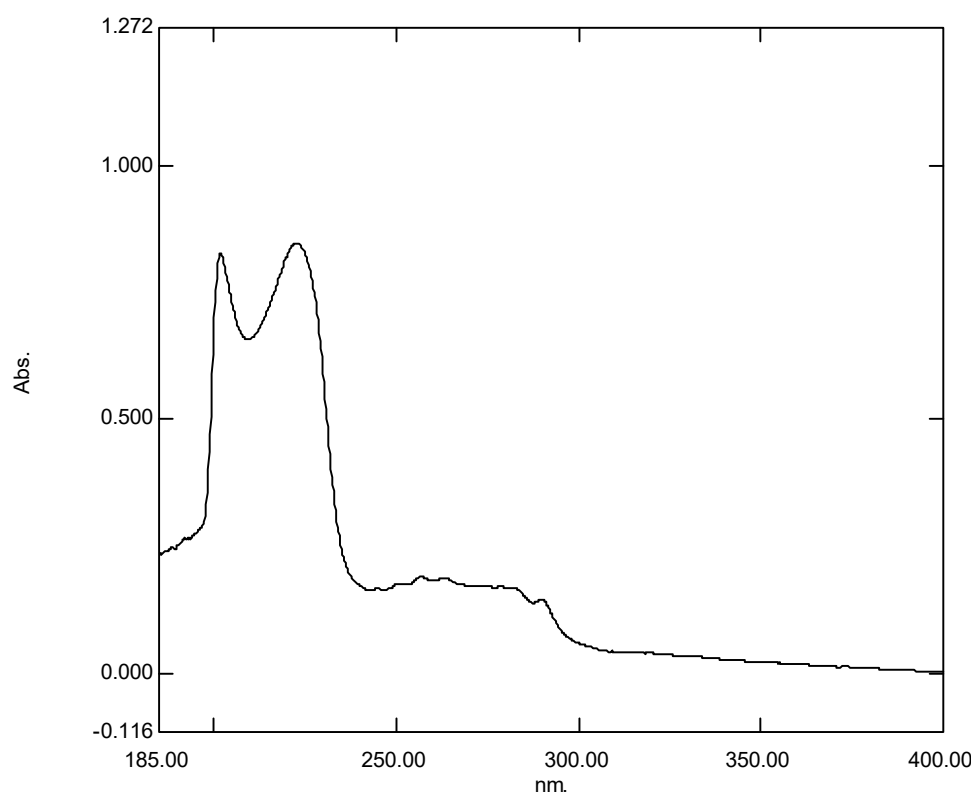

**Figure S37.** UV spectrum of compound 2.

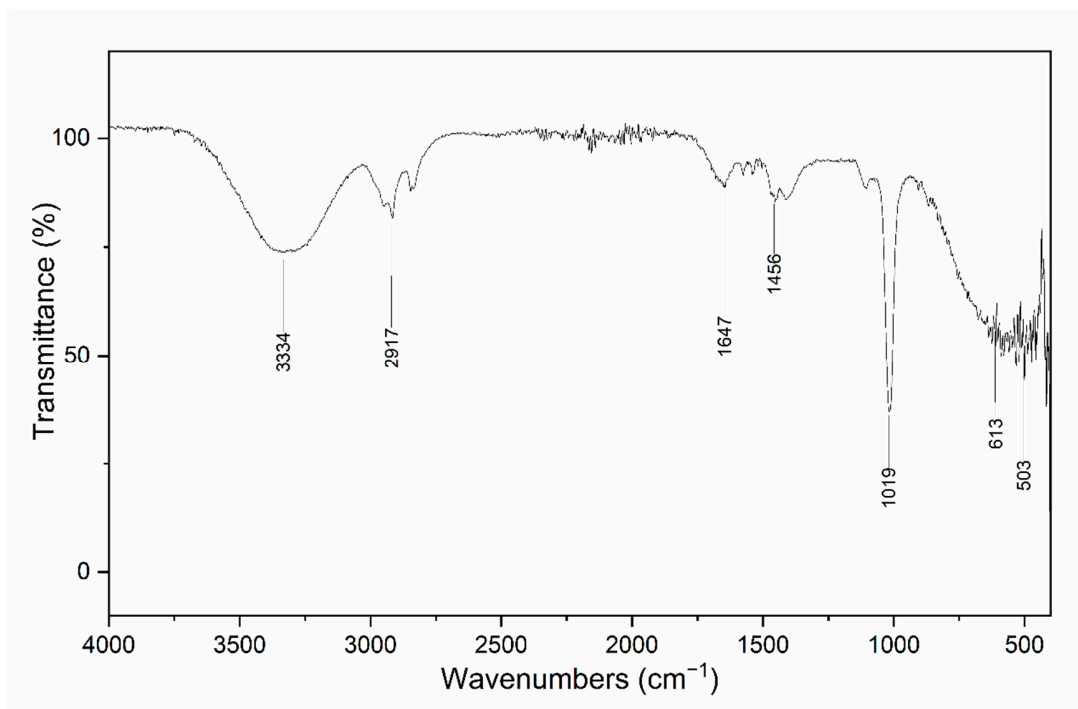

**Figure S38.** IR spectrum of compound 1.

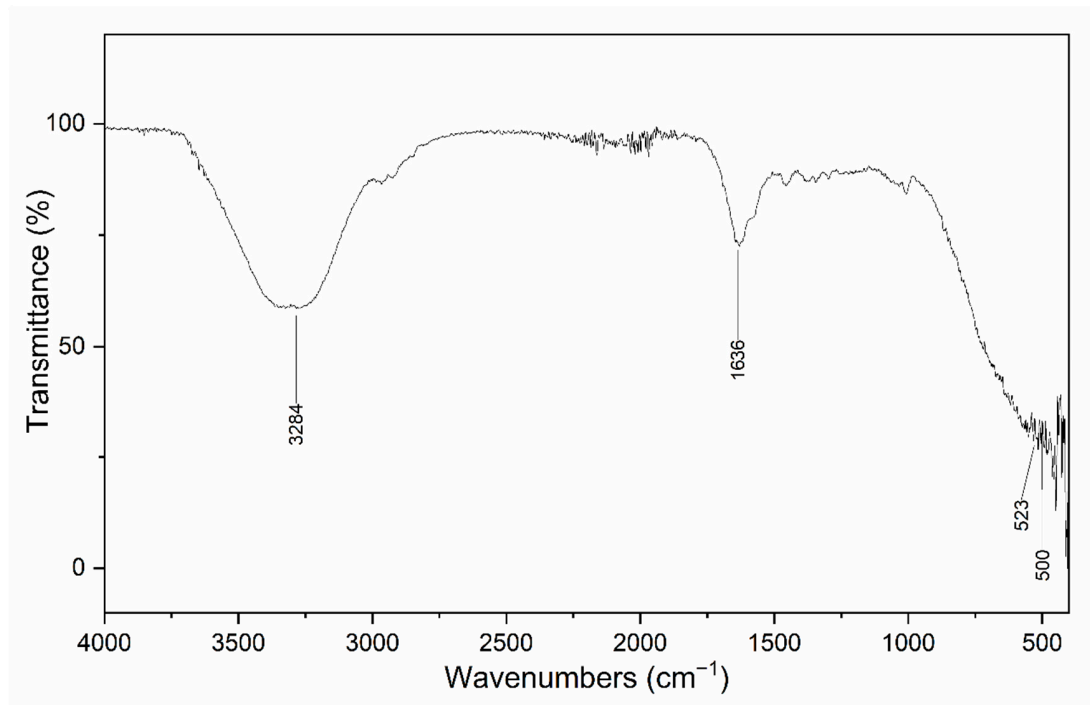

**Figure S39.** IR spectrum of compound 2.

**Data S3. Analysis of (+)-HR-ESI-MS/MS data of compound 1 and 5.**

F: FTMS + p ESI Full ms2 368.1960@hcd30.00 [50.0000-395.0000]

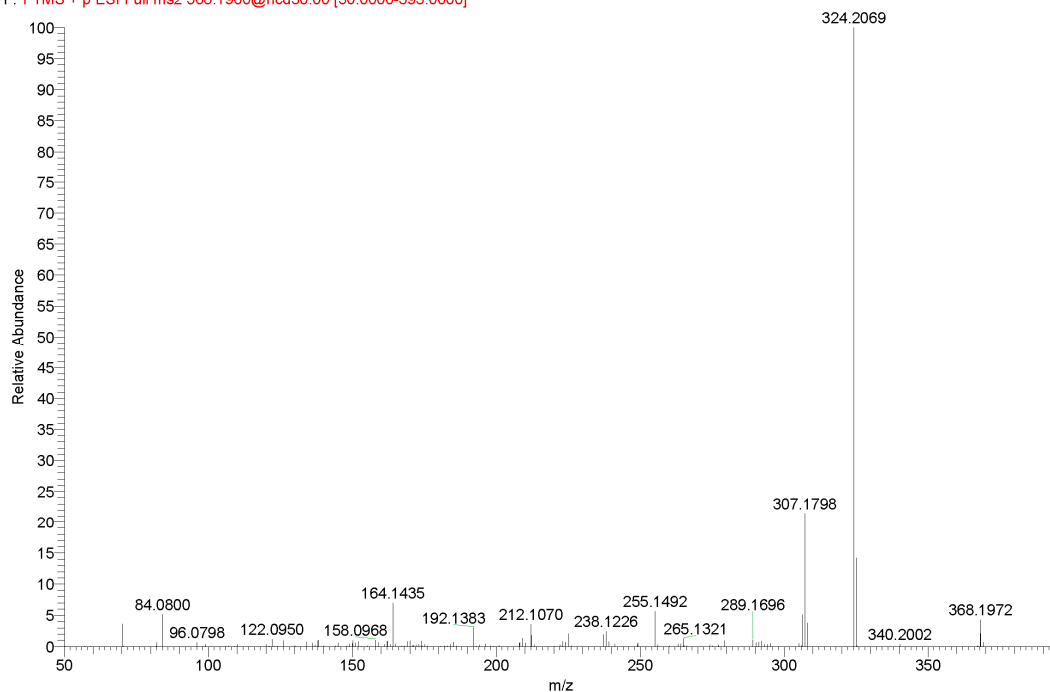

**Figure S40.** (+)-HR-ESI-MS/MS spectrum of **1**.

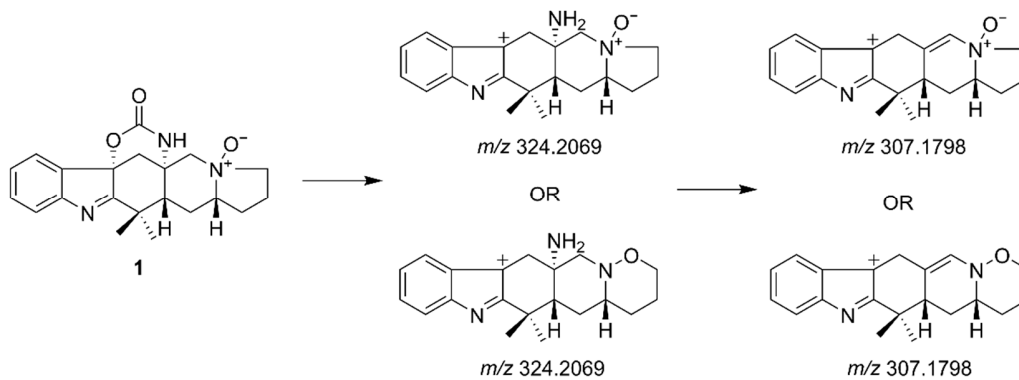

**Scheme S1.** A possible molecular cleavage process for **1**.

F: FTMS + p ESI Full ms2 352.2012@hcd30.00 [50.0000-380.0000]

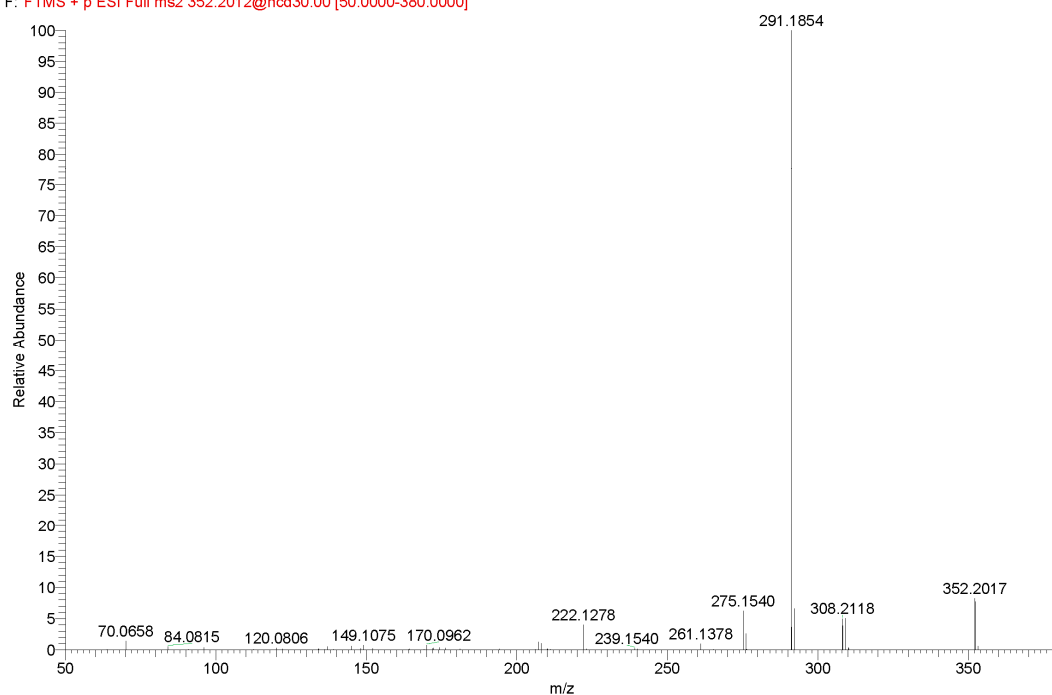

**Figure S41.** (+)-HR-ESI-MS/MS spectrum of **5**.

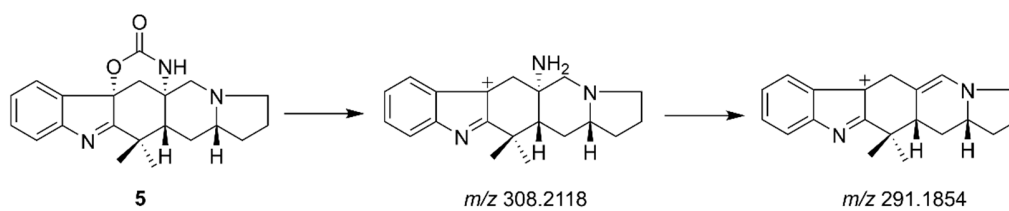

**Scheme S2.** A possible molecular cleavage process for **5**.

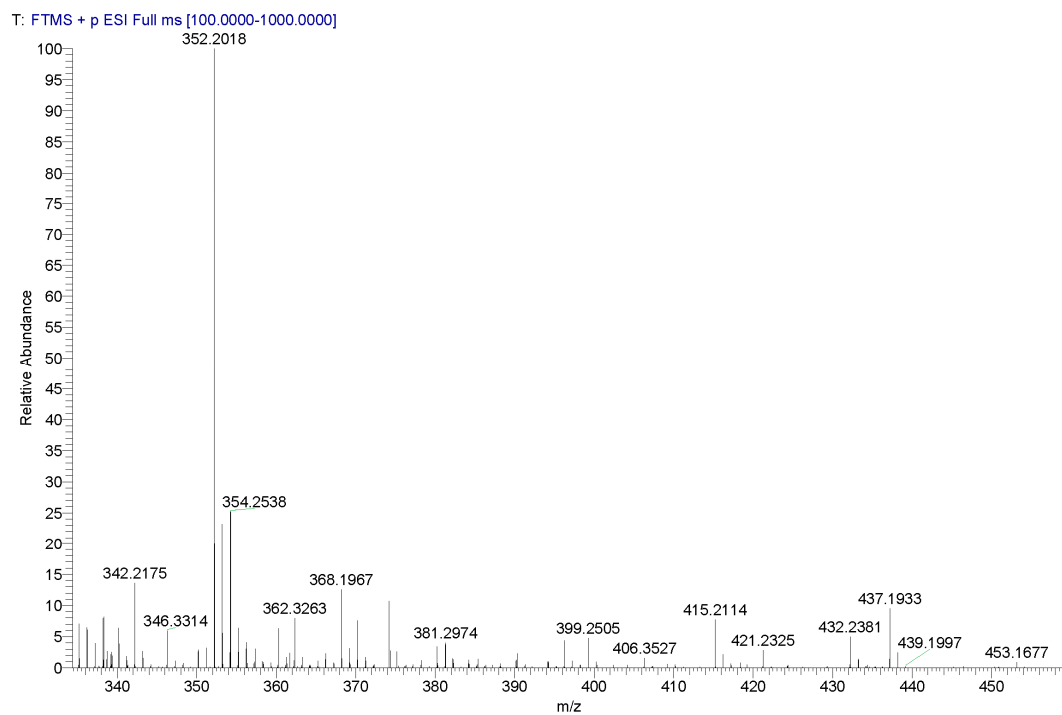

**Figure S42.** (+)-HR-ESI-MS spectrum of reaction product of **1**.



# **Data S4. Biological assay**

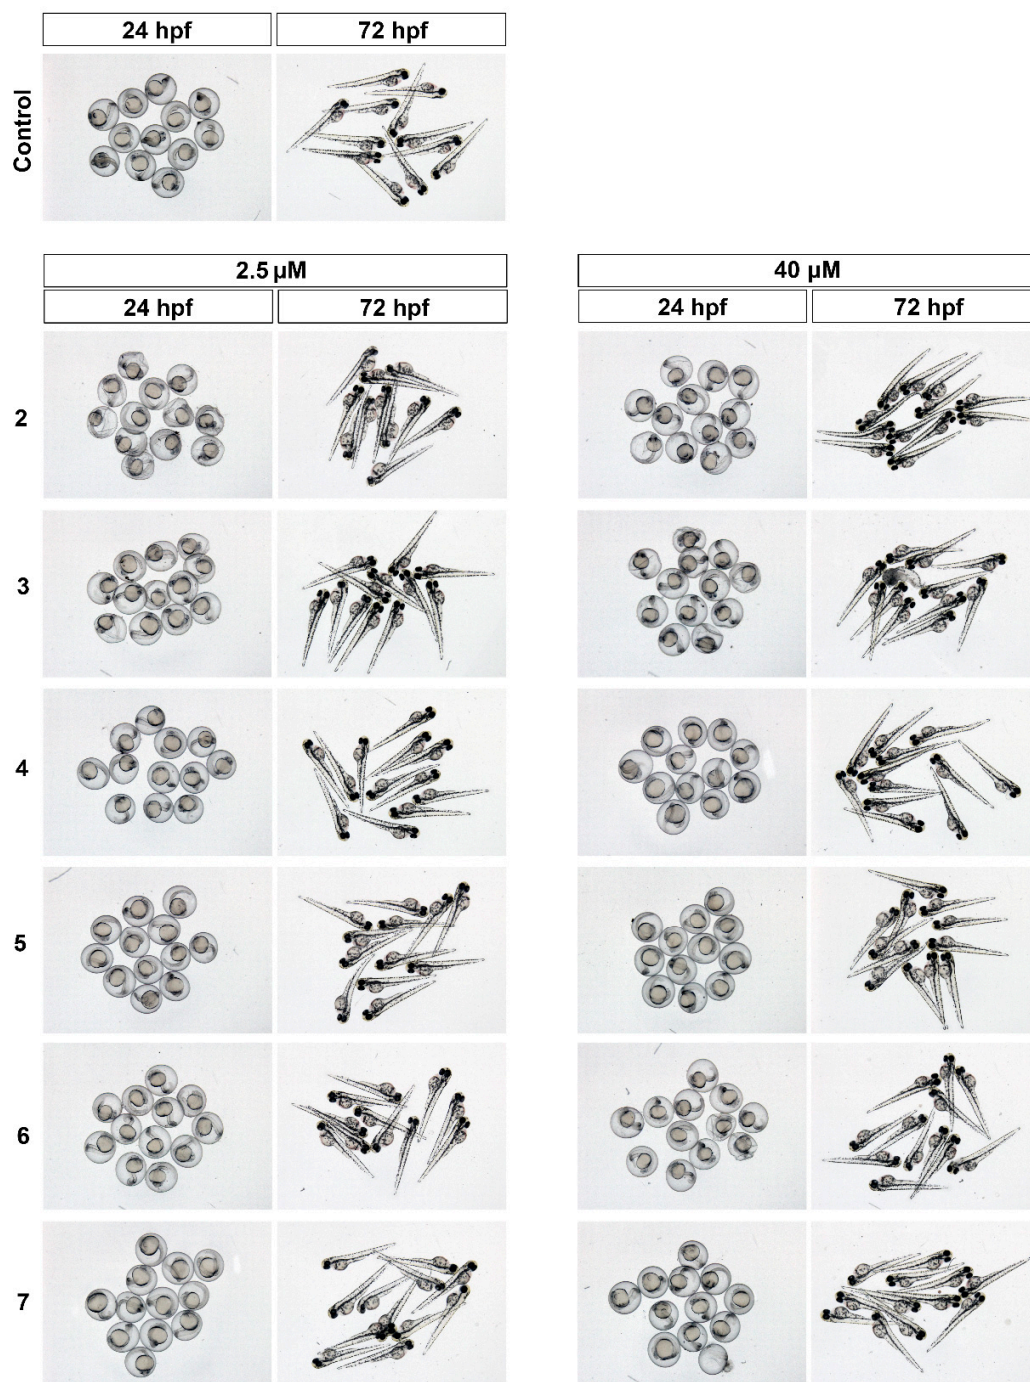

**Figure S43.** Morphology of 24 hpf embryos or 72 hpf zebrafish larvae treated with compounds 2-7.

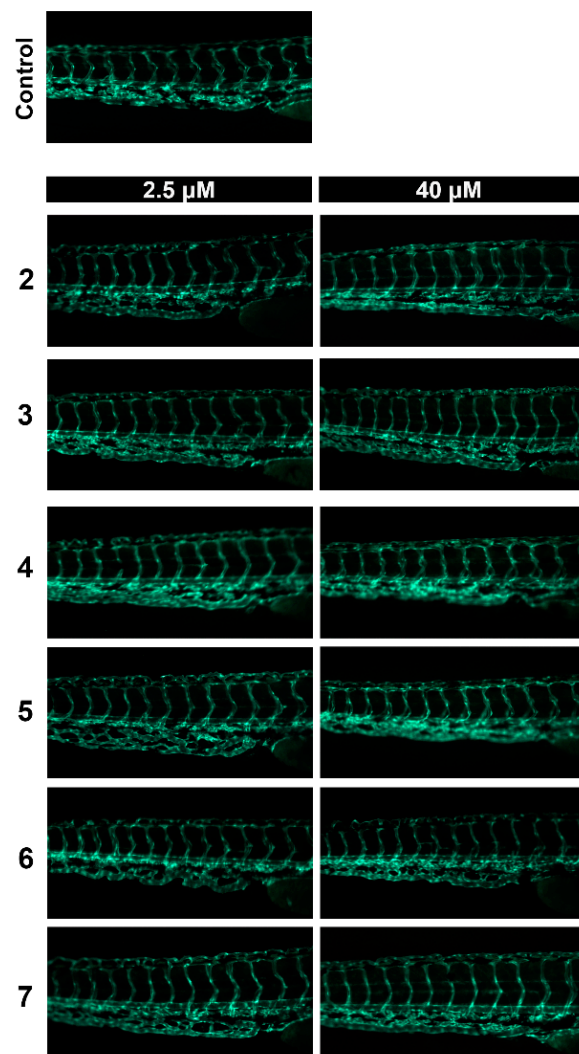

**Figure S44.** Blood vessels morphology of 6 dpf zebrafish larvae *Tg(fli1:eGFP)* treated with compounds **2-7**.

# **Data S5. The BLAST search result of ITS sequence of fungus A-S-6.**

*Pallidocercospora crystallina* strain ZJUM 2 18S ribosomal RNA gene, partial sequence; internal transcribed spacer 1, 5.8S ribosomal RNA gene, and internal transcribed spacer 2, complete sequence; and 28S ribosomal RNA gene, partial sequence.

Sequence ID: KP896014.1 Length: 556 Number of Matches: 1

| Range 1: 2 to 509 <a href="#">GenBank</a> <a href="#">Graphics</a> |                                                               |              |           |            | ▼ Next Match ▲ P |
|--------------------------------------------------------------------|---------------------------------------------------------------|--------------|-----------|------------|------------------|
| Score                                                              | Expect                                                        | Identities   | Gaps      | Strand     |                  |
| 929 bits(503)                                                      | 0.0                                                           | 508/510(99%) | 2/510(0%) | Plus/Minus |                  |
| Query 1                                                            | CCGAGGTCAACCTTGTGAAAGATTTAACGGCCGCGGCCACCCGACCTCCGAAGCGAATAG  |              |           |            | 60               |
| Sbjct 509                                                          | CCGAGGTCAACCTTGTGAAAGATTTAACGGCCGCGGCCACCCGACCTCCGAAGCGAATAG  |              |           |            | 450              |
| Query 61                                                           | TTGCCACAACGCTTAGAGACGGACAGCTCAGCCGGAAGACTTTAAGGCGCGGAGCCGC    |              |           |            | 120              |
| Sbjct 449                                                          | TTGCCACAACGCTTAGAGACGGACAGCTCAGCCGGAAGACTTTAAGGCGCGGAGCCGC    |              |           |            | 390              |
| Query 121                                                          | GACGCCCAATACCAAGCCAGGCTTGAGTGGTGAATGACGCTCGAACAGGCATGCCCCC    |              |           |            | 180              |
| Sbjct 389                                                          | GACGCCCAATACCAAGCCAGGCTTGAGTGGTGAATGACGCTCGAACAGGCATGCCCCC    |              |           |            | 330              |
| Query 181                                                          | GGAATACCAGGGGGCGCAATGTGCGTTCAAAGATTTCGATGATTCAGTGAATTCTGCAATT |              |           |            | 240              |
| Sbjct 329                                                          | GGAATACCAGGGGGCGCAATGTGCGTTCAAAGATTTCGATGATTCAGTGAATTCTGCAATT |              |           |            | 270              |
| Query 241                                                          | CACATTACTTATCGCATTTTCGCTGCGTTCTTCATCGATGCTGGAACCAAGAGATCCGTTG |              |           |            | 300              |
| Sbjct 269                                                          | CACATTACTTATCGCATTTTCGCTGCGTTCTTCATCGATGCTGGAACCAAGAGATCCGTTG |              |           |            | 210              |
| Query 301                                                          | TTGAAAGTTTTGTTTAATTTACTTTAACTCCGACGCAATGATGCAGTGTTTAATGGCCTC  |              |           |            | 360              |
| Sbjct 209                                                          | TTGAAAGTTTTGTTTAATTTACTTTAACTCCGACGCAATGATGCAGTGTTTAATGGCCTC  |              |           |            | 150              |
| Query 361                                                          | CGGGGGCGCCGACCGCCGAAGCGGCAGGTCGCCCCGAAGCAACAAGTTTGTTTACA      |              |           |            | 420              |
| Sbjct 149                                                          | CGGGGGCGCCGACCGCCGAAGCGGCAGGTCGCCCCGAAGCAACAAGTTTGTTTACA      |              |           |            | 90               |
| Query 421                                                          | AAGGGTTGGAGGTCGGACCGAAGCCCTCACTCAGTAATGATCCCTCCGCAGGTTACCTA   |              |           |            | 480              |
| Sbjct 89                                                           | AAGGGTTGGAGGTCGGACCGAAGCCCTCACTCAGTAATGATCCCTCCGCAGGTTACCTA   |              |           |            | 30               |
| Query 481                                                          | CGGAGACCTTGTTACGACTTTTTTACTTCC                                | 510          |           |            |                  |
| Sbjct 29                                                           | CGGAGACCTTGTTACGACTTTT--ACTTCC                                | 2            |           |            |                  |
